# Supplementary material
Source: MDPI journal article supplement (https://www.mdpi.com/2304-6740/11/12/481)
Supplement: s1 [file s1]

## Supporting Information

**Table S1.** Spatial parameters of  $V_{1.13}Se_{0.72}Te_{1.28}$  and  $V_{1.10}Se_{0.42}Te_{1.58}$ . The refined Se occupancies are designated with  $\varepsilon_1 = 0.36(3)$  and  $\varepsilon_2 = 0.21(3)$ .

| Atom                         | Position | $x$           | $y$           | $z$      | Occupancy           | $U_{eq} (\text{\AA}^2)$ |
|------------------------------|----------|---------------|---------------|----------|---------------------|-------------------------|
| $V_{1.13}Se_{0.72}Te_{1.28}$ |          |               |               |          |                     |                         |
| V1                           | 1a       | 0             | 0             | 0        | 1                   | 0.0582(13)              |
| V2                           | 1b       | 0             | $\frac{1}{2}$ | 0        | 0.128(11)           | 0.028(6)                |
| Se                           | 2d       | $\frac{1}{3}$ | $\frac{2}{3}$ | 0.235(3) | $\varepsilon_1$     | 0.0212(7)               |
| Te                           | 2d       | $\frac{1}{3}$ | $\frac{2}{3}$ | 0.265(1) | $1 - \varepsilon_1$ | "                       |
| $V_{1.10}Se_{0.42}Te_{1.58}$ |          |               |               |          |                     |                         |
| V1                           | 1a       | 0             | 0             | 0        | 1                   | 0.0469(10)              |
| V2                           | 1b       | 0             | $\frac{1}{2}$ | 0        | 0.099(12)           | 0.035(8)                |
| Se                           | 2d       | $\frac{1}{3}$ | $\frac{2}{3}$ | 0.214(3) | $\varepsilon_2$     | 0.0088(16)              |
| Te                           | 2d       | $\frac{1}{3}$ | $\frac{2}{3}$ | 0.266(1) | $1 - \varepsilon_2$ | 0.0186(5)               |

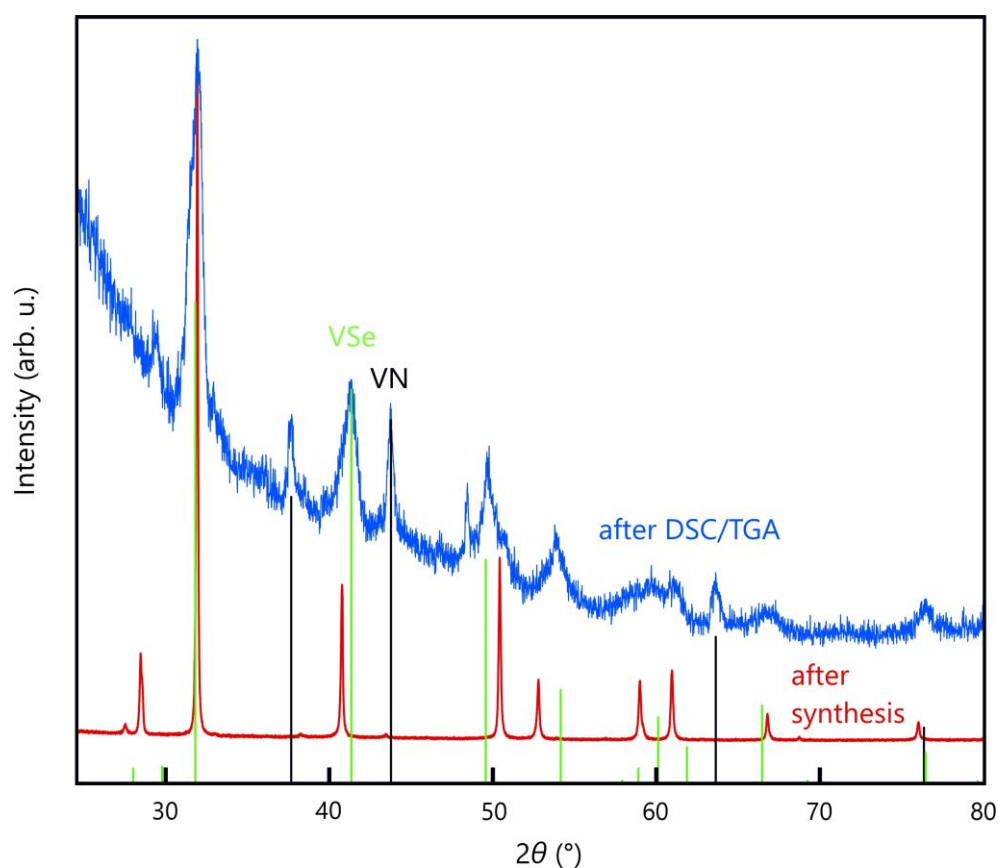

**Figure S1.** Comparison of  $VSe_{0.72}Te_{1.28}$  powder X-ray data after synthesis (red), after DSC/TGA (blue), and Bragg positions of VSe [28] (green) and VN [29] (black).

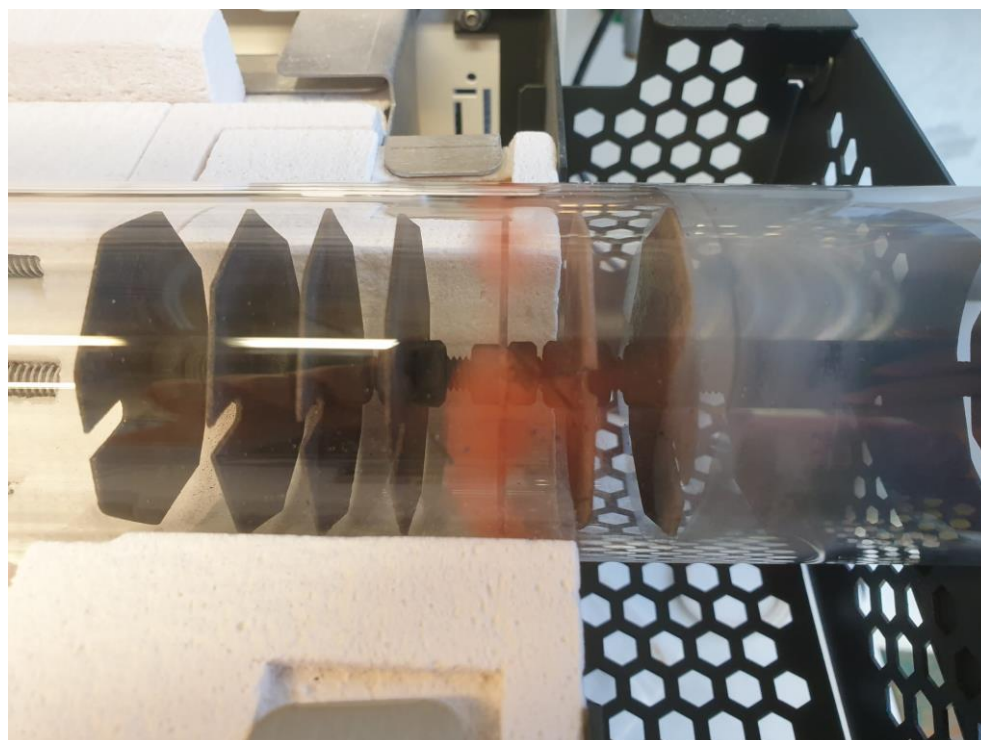

**Figure S2.** Glass tube of the furnace with orange and gray layers after heating in argon atmosphere.

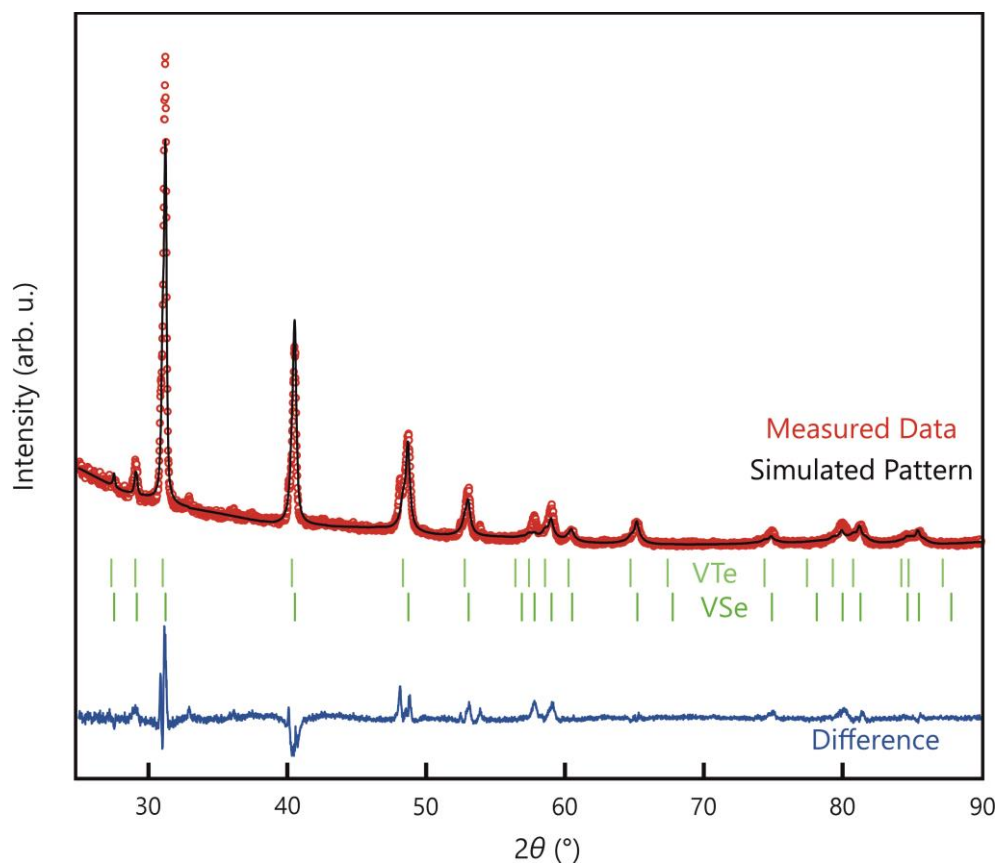

**Figure S3.** Rietveld refinement of the  $\text{VSe}_{0.72}\text{Te}_{1.32}$  powder after being heated in argon atmosphere with measured data in red, simulated pattern in black, Bragg positions in green, and the difference between measured and calculated pattern in blue.

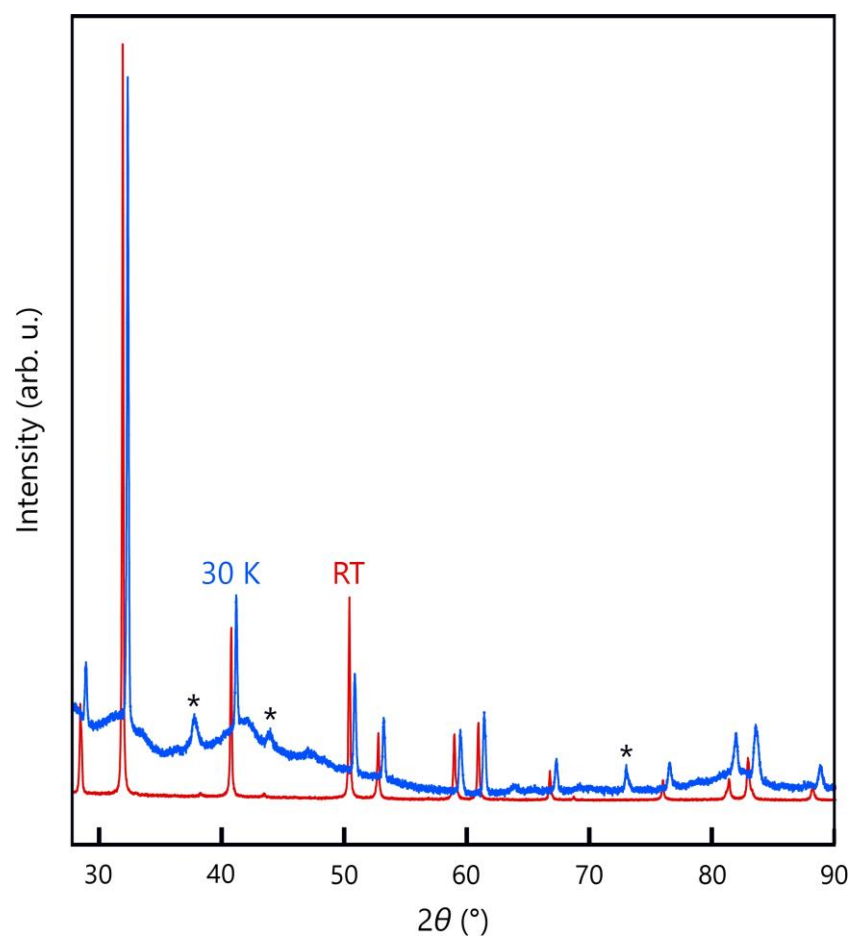

**Figure S4.** Comparison of  $\text{VSe}_{0.72}\text{Te}_{1.28}$  powder X-ray data at room temperature in red and at 30 K in blue. The asterisks mark additional reflections, most likely of the sample holder.
