# Supplementary material
Source: MDPI journal article supplement (https://www.mdpi.com/2304-6740/11/12/481)
Supplement: s1 [file s1]

Archive with 5 entries (5 files):
- checkcif_V1.10Se0.42Te1.58.pdf
- checkcif_V1.13Se0.72Te1.28.pdf
- inorganics-2739405-supplementary.pdf
- V1.10Se0.42Te1.58_final.cif
- V1.13Se0.72Te1.28_final.cif
