# Supplementary material
Source: MDPI journal article supplement (https://www.mdpi.com/2304-6740/11/12/481)
Supplement: s1 [file s1 › V1.10Se0.42Te1.58_final.cif]

 
data_shelx
 
_audit_creation_method            'SHELXL-2018/1'
_shelx_SHELXL_version_number      '2018/1'
_chemical_name_systematic         ?
_chemical_name_common             ?
_chemical_melting_point           ?
_chemical_formula_moiety          ?
_chemical_formula_sum
 'Se0.42 Te1.58 V1.10' 
_chemical_formula_weight          290.81

loop_
 _atom_type_symbol
 _atom_type_description
 _atom_type_scat_dispersion_real
 _atom_type_scat_dispersion_imag
 _atom_type_scat_source
 'V'  'V'   0.3005   0.5294
 'International Tables Vol C Tables 4.2.6.8 and 6.1.1.4'
 'Se'  'Se'  -0.0929   2.2259
 'International Tables Vol C Tables 4.2.6.8 and 6.1.1.4'
 'Te'  'Te'  -0.5308   1.6751
 'International Tables Vol C Tables 4.2.6.8 and 6.1.1.4'
 
_space_group_crystal_system       trigonal
_space_group_IT_number            164
_space_group_name_H-M_alt         'P -3 m 1'
_space_group_name_Hall            '-P 3 2"'
 
_shelx_space_group_comment
;
The symmetry employed for this shelxl refinement is uniquely defined
by the following loop, which should always be used as a source of
symmetry information in preference to the above space-group names.
They are only intended as comments.
;
 
loop_
 _space_group_symop_operation_xyz
 'x, y, z'
 '-y, x-y, z'
 '-x+y, -x, z'
 'y, x, -z'
 'x-y, -y, -z'
 '-x, -x+y, -z'
 '-x, -y, -z'
 'y, -x+y, -z'
 'x-y, x, -z'
 '-y, -x, z'
 '-x+y, y, z'
 'x, x-y, z'
 
_cell_length_a                    3.633(7)
_cell_length_b                    3.633(7)
_cell_length_c                    6.365(12)
_cell_angle_alpha                 90
_cell_angle_beta                  90
_cell_angle_gamma                 120
_cell_volume                      72.7(3)
_cell_formula_units_Z             1
_cell_measurement_temperature     293(2)
_cell_measurement_reflns_used     399
_cell_measurement_theta_min       3.201
_cell_measurement_theta_max       29.704
 
_exptl_crystal_description        hexagonal
_exptl_crystal_colour             black
_exptl_crystal_density_meas       ?
_exptl_crystal_density_method     ?
_exptl_crystal_density_diffrn     6.639          
_exptl_crystal_F_000              122
_exptl_transmission_factor_min    ?
_exptl_transmission_factor_max    ?
_exptl_crystal_size_max           0.08
_exptl_crystal_size_mid           0.07
_exptl_crystal_size_min           0.07
_exptl_absorpt_coefficient_mu     24.140
_shelx_estimated_absorpt_T_min    ?
_shelx_estimated_absorpt_T_max    ?
_exptl_absorpt_correction_type    multi-scan
_exptl_absorpt_correction_T_min   0.3830
_exptl_absorpt_correction_T_max   0.7462
_exptl_absorpt_process_details    'SADABAS, R. H. Blessing, Acta Crystallogr. A 1995, 51, 33'
_exptl_absorpt_special_details    ?
_diffrn_ambient_temperature       293(2)
_diffrn_radiation_wavelength      0.71073
_diffrn_radiation_type            MoK\a
_diffrn_source                    'fine-focus sealed tube'
_diffrn_measurement_device_type   'Bruker APEX CCD'
_diffrn_measurement_method        ?
_diffrn_detector_area_resol_mean  ?
_diffrn_reflns_number             585
_diffrn_reflns_av_unetI/netI      0.0215
_diffrn_reflns_av_R_equivalents   0.0282
_diffrn_reflns_limit_h_min        -5
_diffrn_reflns_limit_h_max        4
_diffrn_reflns_limit_k_min        -4
_diffrn_reflns_limit_k_max        5
_diffrn_reflns_limit_l_min        -9
_diffrn_reflns_limit_l_max        7
_diffrn_reflns_theta_min          3.201
_diffrn_reflns_theta_max          31.001
_diffrn_reflns_theta_full         25.242
_diffrn_measured_fraction_theta_max   0.982
_diffrn_measured_fraction_theta_full  1.000
_diffrn_reflns_Laue_measured_fraction_max    0.982
_diffrn_reflns_Laue_measured_fraction_full   1.000
_diffrn_reflns_point_group_measured_fraction_max   0.982
_diffrn_reflns_point_group_measured_fraction_full  1.000
_reflns_number_total              111
_reflns_number_gt                 107
_reflns_threshold_expression      'I > 2\s(I)'
_reflns_Friedel_coverage          0.000
_reflns_Friedel_fraction_max      .
_reflns_Friedel_fraction_full     .
 
_reflns_special_details
;
 Reflections were merged by SHELXL according to the crystal
 class for the calculation of statistics and refinement.
 
 _reflns_Friedel_fraction is defined as the number of unique
 Friedel pairs measured divided by the number that would be
 possible theoretically, ignoring centric projections and
 systematic absences.
;
 
_computing_data_collection        ?
_computing_cell_refinement        ?
_computing_data_reduction         ?
_computing_structure_solution     ?
_computing_structure_refinement 'SHELXL-2018/1 (Sheldrick, 2018)'
_computing_molecular_graphics     ?
_computing_publication_material   ?
_refine_special_details           ?
_refine_ls_structure_factor_coef  Fsqd
_refine_ls_matrix_type            full
_refine_ls_weighting_scheme       calc
_refine_ls_weighting_details
'w=1/[\s^2^(Fo^2^)+(0.0240P)^2^+0.2441P] where P=(Fo^2^+2Fc^2^)/3'
_atom_sites_solution_primary      ?
_atom_sites_solution_secondary    ?
_atom_sites_solution_hydrogens    .
_refine_ls_hydrogen_treatment     undef
_refine_ls_extinction_method      'SHELXL-2018/1 (Sheldrick 2018)'
_refine_ls_extinction_coef        0.200(18)
_refine_ls_extinction_expression
 'Fc^*^=kFc[1+0.001xFc^2^\l^3^/sin(2\q)]^-1/4^'
_refine_ls_number_reflns          111
_refine_ls_number_parameters      14
_refine_ls_number_restraints      0
_refine_ls_R_factor_all           0.0202
_refine_ls_R_factor_gt            0.0192
_refine_ls_wR_factor_ref          0.0416
_refine_ls_wR_factor_gt           0.0411
_refine_ls_goodness_of_fit_ref    0.987
_refine_ls_restrained_S_all       0.987
_refine_ls_shift/su_max           0.000
_refine_ls_shift/su_mean          0.000
 
loop_
 _atom_site_label
 _atom_site_type_symbol
 _atom_site_fract_x
 _atom_site_fract_y
 _atom_site_fract_z
 _atom_site_U_iso_or_equiv
 _atom_site_adp_type
 _atom_site_occupancy
 _atom_site_site_symmetry_order  
 _atom_site_calc_flag
 _atom_site_refinement_flags_posn
 _atom_site_refinement_flags_adp
 _atom_site_refinement_flags_occupancy
 _atom_site_disorder_assembly
 _atom_site_disorder_group
V1 V 0.000000 0.000000 0.000000 0.0469(10) Uani 1 12 d S T P . .
V2 V 0.000000 0.000000 0.500000 0.035(8) Uani 0.099(12) 12 d S T P . .
Se Se 0.333333 0.666667 0.214(3) 0.0088(16) Uani 0.21(3) 6 d S T P . .
Te Te 0.333333 0.666667 0.2664(9) 0.0186(5) Uani 0.79(3) 6 d S T P . .
 
loop_
 _atom_site_aniso_label
 _atom_site_aniso_U_11
 _atom_site_aniso_U_22
 _atom_site_aniso_U_33
 _atom_site_aniso_U_23
 _atom_site_aniso_U_13
 _atom_site_aniso_U_12
V1 0.0629(14) 0.0629(14) 0.0149(10) 0.000 0.000 0.0315(7)
V2 0.036(10) 0.036(10) 0.034(13) 0.000 0.000 0.018(5)
Se 0.0120(14) 0.0120(14) 0.002(4) 0.000 0.000 0.0060(7)
Te 0.0163(4) 0.0163(4) 0.0230(13) 0.000 0.000 0.00816(19)
 
_geom_special_details
;
 All esds (except the esd in the dihedral angle between two l.s. planes)
 are estimated using the full covariance matrix.  The cell esds are taken
 into account individually in the estimation of esds in distances, angles
 and torsion angles; correlations between esds in cell parameters are only
 used when they are defined by crystal symmetry.  An approximate (isotropic)
 treatment of cell esds is used for estimating esds involving l.s. planes.
;
 
loop_
 _geom_bond_atom_site_label_1
 _geom_bond_atom_site_label_2
 _geom_bond_distance
 _geom_bond_site_symmetry_2
 _geom_bond_publ_flag
V1 Se 2.502(9) 7 ?
V1 Se 2.502(9) . ?
V1 Se 2.502(9) 7_665 ?
V1 Se 2.502(9) 1_445 ?
V1 Se 2.502(9) 1_545 ?
V1 Se 2.502(9) 7_565 ?
V1 Te 2.697(5) 7 ?
V1 Te 2.697(5) 7_665 ?
V1 Te 2.697(5) 1_445 ?
V1 Te 2.697(5) . ?
V1 Te 2.697(5) 1_545 ?
V1 Te 2.697(5) 7_565 ?
V2 Te 2.571(5) 7_666 ?
V2 Te 2.571(5) 1_445 ?
V2 Te 2.571(5) . ?
V2 Te 2.571(5) 7_556 ?
V2 Te 2.571(5) 7_566 ?
V2 Te 2.571(5) 1_545 ?
V2 Se 2.776(11) 1_445 ?
V2 Se 2.776(11) 7_666 ?
V2 Se 2.776(11) 7_556 ?
V2 Se 2.776(11) . ?
V2 Se 2.776(11) 1_545 ?
V2 Se 2.776(11) 7_566 ?
 
loop_
 _geom_angle_atom_site_label_1
 _geom_angle_atom_site_label_2
 _geom_angle_atom_site_label_3
 _geom_angle
 _geom_angle_site_symmetry_1
 _geom_angle_site_symmetry_3
 _geom_angle_publ_flag
Se V1 Se 180.0 7 . ?
Se V1 Se 93.1(4) 7 7_665 ?
Se V1 Se 86.9(4) . 7_665 ?
Se V1 Se 86.9(4) 7 1_445 ?
Se V1 Se 93.1(4) . 1_445 ?
Se V1 Se 180.0 7_665 1_445 ?
Se V1 Se 86.9(4) 7 1_545 ?
Se V1 Se 93.1(4) . 1_545 ?
Se V1 Se 86.9(4) 7_665 1_545 ?
Se V1 Se 93.1(4) 1_445 1_545 ?
Se V1 Se 93.1(4) 7 7_565 ?
Se V1 Se 86.9(4) . 7_565 ?
Se V1 Se 93.1(4) 7_665 7_565 ?
Se V1 Se 86.9(4) 1_445 7_565 ?
Se V1 Se 180.0 1_545 7_565 ?
Se V1 Te 5.9(2) 7 7 ?
Se V1 Te 174.1(2) . 7 ?
Se V1 Te 89.0(3) 7_665 7 ?
Se V1 Te 91.0(3) 1_445 7 ?
Se V1 Te 91.0(3) 1_545 7 ?
Se V1 Te 89.0(3) 7_565 7 ?
Se V1 Te 89.0(3) 7 7_665 ?
Se V1 Te 91.0(3) . 7_665 ?
Se V1 Te 5.9(2) 7_665 7_665 ?
Se V1 Te 174.1(2) 1_445 7_665 ?
Se V1 Te 91.0(3) 1_545 7_665 ?
Se V1 Te 89.0(3) 7_565 7_665 ?
Te V1 Te 84.67(18) 7 7_665 ?
Se V1 Te 91.0(3) 7 1_445 ?
Se V1 Te 89.0(3) . 1_445 ?
Se V1 Te 174.1(2) 7_665 1_445 ?
Se V1 Te 5.9(2) 1_445 1_445 ?
Se V1 Te 89.0(3) 1_545 1_445 ?
Se V1 Te 91.0(3) 7_565 1_445 ?
Te V1 Te 95.33(18) 7 1_445 ?
Te V1 Te 180.0 7_665 1_445 ?
Se V1 Te 174.1(2) 7 . ?
Se V1 Te 5.9(2) . . ?
Se V1 Te 91.0(3) 7_665 . ?
Se V1 Te 89.0(3) 1_445 . ?
Se V1 Te 89.0(3) 1_545 . ?
Se V1 Te 91.0(3) 7_565 . ?
Te V1 Te 180.0 7 . ?
Te V1 Te 95.33(18) 7_665 . ?
Te V1 Te 84.67(18) 1_445 . ?
Se V1 Te 91.0(3) 7 1_545 ?
Se V1 Te 89.0(3) . 1_545 ?
Se V1 Te 91.0(3) 7_665 1_545 ?
Se V1 Te 89.0(3) 1_445 1_545 ?
Se V1 Te 5.9(2) 1_545 1_545 ?
Se V1 Te 174.1(2) 7_565 1_545 ?
Te V1 Te 95.33(18) 7 1_545 ?
Te V1 Te 95.33(18) 7_665 1_545 ?
Te V1 Te 84.67(18) 1_445 1_545 ?
Te V1 Te 84.67(18) . 1_545 ?
Se V1 Te 89.0(3) 7 7_565 ?
Se V1 Te 91.0(3) . 7_565 ?
Se V1 Te 89.0(3) 7_665 7_565 ?
Se V1 Te 91.0(3) 1_445 7_565 ?
Se V1 Te 174.1(2) 1_545 7_565 ?
Se V1 Te 5.9(2) 7_565 7_565 ?
Te V1 Te 84.67(18) 7 7_565 ?
Te V1 Te 84.67(18) 7_665 7_565 ?
Te V1 Te 95.33(18) 1_445 7_565 ?
Te V1 Te 95.33(18) . 7_565 ?
Te V1 Te 180.00(19) 1_545 7_565 ?
Te V2 Te 180.0 7_666 1_445 ?
Te V2 Te 90.10(18) 7_666 . ?
Te V2 Te 89.90(18) 1_445 . ?
Te V2 Te 89.90(18) 7_666 7_556 ?
Te V2 Te 90.10(18) 1_445 7_556 ?
Te V2 Te 180.0 . 7_556 ?
Te V2 Te 89.90(18) 7_666 7_566 ?
Te V2 Te 90.10(18) 1_445 7_566 ?
Te V2 Te 90.10(18) . 7_566 ?
Te V2 Te 89.90(18) 7_556 7_566 ?
Te V2 Te 90.10(18) 7_666 1_545 ?
Te V2 Te 89.90(18) 1_445 1_545 ?
Te V2 Te 89.90(18) . 1_545 ?
Te V2 Te 90.10(18) 7_556 1_545 ?
Te V2 Te 180.0 7_566 1_545 ?
Te V2 Se 174.40(18) 7_666 1_445 ?
Te V2 Se 5.60(17) 1_445 1_445 ?
Te V2 Se 85.9(3) . 1_445 ?
Te V2 Se 94.1(3) 7_556 1_445 ?
Te V2 Se 94.1(3) 7_566 1_445 ?
Te V2 Se 85.9(3) 1_545 1_445 ?
Te V2 Se 5.60(17) 7_666 7_666 ?
Te V2 Se 174.40(18) 1_445 7_666 ?
Te V2 Se 94.1(3) . 7_666 ?
Te V2 Se 85.9(3) 7_556 7_666 ?
Te V2 Se 85.9(3) 7_566 7_666 ?
Te V2 Se 94.1(3) 1_545 7_666 ?
Se V2 Se 180.0(5) 1_445 7_666 ?
Te V2 Se 85.9(3) 7_666 7_556 ?
Te V2 Se 94.1(3) 1_445 7_556 ?
Te V2 Se 174.40(18) . 7_556 ?
Te V2 Se 5.60(17) 7_556 7_556 ?
Te V2 Se 85.9(3) 7_566 7_556 ?
Te V2 Se 94.1(3) 1_545 7_556 ?
Se V2 Se 98.3(4) 1_445 7_556 ?
Se V2 Se 81.7(4) 7_666 7_556 ?
Te V2 Se 94.1(3) 7_666 . ?
Te V2 Se 85.9(3) 1_445 . ?
Te V2 Se 5.60(17) . . ?
Te V2 Se 174.40(18) 7_556 . ?
Te V2 Se 94.1(3) 7_566 . ?
Te V2 Se 85.9(3) 1_545 . ?
Se V2 Se 81.7(4) 1_445 . ?
Se V2 Se 98.3(4) 7_666 . ?
Se V2 Se 180.0 7_556 . ?
Te V2 Se 94.1(3) 7_666 1_545 ?
Te V2 Se 85.9(3) 1_445 1_545 ?
Te V2 Se 85.9(3) . 1_545 ?
Te V2 Se 94.1(3) 7_556 1_545 ?
Te V2 Se 174.40(17) 7_566 1_545 ?
Te V2 Se 5.60(17) 1_545 1_545 ?
Se V2 Se 81.7(4) 1_445 1_545 ?
Se V2 Se 98.3(4) 7_666 1_545 ?
Se V2 Se 98.3(4) 7_556 1_545 ?
Se V2 Se 81.7(4) . 1_545 ?
Te V2 Se 85.9(3) 7_666 7_566 ?
Te V2 Se 94.1(3) 1_445 7_566 ?
Te V2 Se 94.1(3) . 7_566 ?
Te V2 Se 85.9(3) 7_556 7_566 ?
Te V2 Se 5.60(17) 7_566 7_566 ?
Te V2 Se 174.40(17) 1_545 7_566 ?
Se V2 Se 98.3(4) 1_445 7_566 ?
Se V2 Se 81.7(4) 7_666 7_566 ?
Se V2 Se 81.7(4) 7_556 7_566 ?
Se V2 Se 98.3(4) . 7_566 ?
Se V2 Se 180.0 1_545 7_566 ?
V1 Se V1 93.1(4) 1_565 . ?
V1 Se V1 93.1(4) 1_565 1_665 ?
V1 Se V1 93.1(4) . 1_665 ?
V1 Se V2 132.36(11) 1_565 1_665 ?
V1 Se V2 132.36(11) . 1_665 ?
V1 Se V2 73.96(15) 1_665 1_665 ?
V1 Se V2 73.96(15) 1_565 1_565 ?
V1 Se V2 132.36(11) . 1_565 ?
V1 Se V2 132.36(11) 1_665 1_565 ?
V2 Se V2 81.7(4) 1_665 1_565 ?
V1 Se V2 132.36(11) 1_565 . ?
V1 Se V2 73.96(15) . . ?
V1 Se V2 132.36(11) 1_665 . ?
V2 Se V2 81.7(4) 1_665 . ?
V2 Se V2 81.7(4) 1_565 . ?
V2 Te V2 89.90(18) 1_665 1_565 ?
V2 Te V2 89.90(18) 1_665 . ?
V2 Te V2 89.90(18) 1_565 . ?
V2 Te V1 132.91(5) 1_665 . ?
V2 Te V1 132.91(5) 1_565 . ?
V2 Te V1 74.28(14) . . ?
V2 Te V1 132.91(5) 1_665 1_565 ?
V2 Te V1 74.28(14) 1_565 1_565 ?
V2 Te V1 132.91(5) . 1_565 ?
V1 Te V1 84.67(18) . 1_565 ?
V2 Te V1 74.28(14) 1_665 1_665 ?
V2 Te V1 132.91(5) 1_565 1_665 ?
V2 Te V1 132.91(5) . 1_665 ?
V1 Te V1 84.67(18) . 1_665 ?
V1 Te V1 84.67(18) 1_565 1_665 ?
 
_refine_diff_density_max    0.807
_refine_diff_density_min   -0.904
_refine_diff_density_rms    0.215

_shelx_res_file
;
TITL Fabi02m_0m in P-3m1
    shelx.res
    created by SHELXL-2018/1 at 13:08:15 on 25-Oct-2023
CELL 0.71073   3.63270   3.63270   6.36460  90.0000  90.0000 120.0000
ZERR    1.00   0.00660   0.00660   0.01170   0.0000   0.0000   0.0000
LATT  1
SYMM -Y, X-Y, Z
SYMM -X+Y, -X, Z
SYMM Y, X, -Z
SYMM X-Y, -Y, -Z
SYMM -X, -X+Y, -Z
SFAC V SE TE
UNIT 1.1 0.42 1.58
LIST 4
L.S. 10
ACTA
FMAP 2
PLAN 20

WGHT    0.024000    0.244100
EXTI    0.199847
FVAR       0.51108   0.09938   0.20743
V1    1    0.000000    0.000000    0.000000    10.08333    0.06294    0.06294 =
         0.01492    0.00000    0.00000    0.03147
V2    1    0.000000    0.000000    0.500000    20.08333    0.03592    0.03592 =
         0.03352    0.00000    0.00000    0.01796
SE    2    0.333333    0.666667    0.214224    30.16667    0.01201    0.01201 =
         0.00243    0.00000    0.00000    0.00601
TE    3    0.333333    0.666667    0.266398   -30.16667    0.01631    0.01631 =
         0.02304    0.00000    0.00000    0.00816
HKLF 4


REM  Fabi02m_0m in P-3m1
REM R1 =  0.0192 for     107 Fo > 4sig(Fo)  and  0.0202 for all     111 data
REM     14 parameters refined using      0 restraints

END

WGHT      0.0233      0.0000

REM Highest difference peak  0.807,  deepest hole -0.904,  1-sigma level  0.215
Q1    1   0.2116  0.7884  0.2110  10.50000  0.05    0.81
Q2    1   0.5000  0.5000  0.0000  10.25000  0.05    0.66
Q3    1   0.4579  0.9159  0.2850  10.50000  0.05    0.61
Q4    1   0.2401  0.0000  0.5000  10.50000  0.05    0.48
Q5    1   0.1525  0.8475  0.2979  10.50000  0.05    0.46
Q6    1  -0.1699  0.1699  0.3020  10.50000  0.05    0.34
Q7    1  -0.3215  0.1173  0.0301  11.00000  0.05    0.33
Q8    1   0.4921  0.5079  0.1341  10.50000  0.05    0.32
Q9    1   0.5945  0.4055  0.2759  10.50000  0.05    0.30
Q10   1   0.5869  0.6277  0.3614  11.00000  0.05    0.28
Q11   1   0.7697  0.5394  0.2223  10.50000  0.05    0.27
Q12   1   0.3333  0.6667 -0.0518  10.16667  0.05    0.26
Q13   1   0.1927  0.3854  0.0687  10.50000  0.05    0.25
Q14   1  -0.1391  0.4304  0.1195  10.50000  0.05    0.23
Q15   1   0.0638  0.1276  0.6213  10.50000  0.05    0.14
Q16   1  -0.0180  0.6768  0.1326  11.00000  0.05    0.13
Q17   1   0.2051  0.4103  0.4854  10.50000  0.05    0.12
Q18   1   0.6036  0.3965  0.4175  10.50000  0.05    0.06
;
_shelx_res_checksum   13728

_shelx_hkl_file
;
   1   0   0  113.16    3.01
   1   0   0  107.78    3.05
   0   1   0  112.35    3.28
   0  -1   0  110.02    4.26
  -1   1   0  110.08    3.16
  -1   0   0  105.56    3.35
  -2   1   0  970.53   21.86
   1  -2   0  949.82   21.46
   1   1   0  901.69   21.33
   1   1   0  821.58   21.20
  -1  -1   0  922.65   22.21
   0   2   0   93.51    3.78
  -2   2   0   88.93    3.43
   2   0   0   92.48    3.02
   2   0   0   92.46    3.27
   0  -2   0   96.02    4.10
  -2   0   0   87.93    3.84
   0   2   0   86.17    3.29
   2   1   0   70.70    2.62
  -3   1   0   67.56    3.68
  -3   2   0   69.68    3.51
   1  -3   0   69.79    2.94
   1   2   0   69.10    3.08
   2   1   0   70.22    3.08
  -2  -1   0   70.14    3.87
  -2   3   0   73.22    3.07
  -1   3   0   71.13    3.59
  -1  -2   0   76.99    4.76
   0   3   0  439.25   15.71
   0   3   0  415.74   11.80
   3   0   0  421.64   12.00
  -3   0   0  441.45   13.47
  -3   3   0  427.69   12.30
  -4   2   0  296.10   10.76
   2   2   0  299.13    9.25
  -2   4   0  292.71   10.33
  -4   1   0   40.35    3.50
   3   1   0   46.22    2.79
  -4   3   0   40.92    3.10
   1   3   0   42.71    2.72
  -3  -1   0   50.05    3.82
  -3   4   0   43.80    2.71
  -1   4   0   44.16    2.85
  -3   4   0   46.76    3.59
   0   4   0   35.34    2.59
  -4   4   0   34.65    2.82
  -4   0   0   34.02    3.36
  -5   3   0   28.92    6.05
   3   2   0   30.48    2.35
  -2   5   0   29.34    2.41
  -3   5   0   29.89    3.78
   0   0  -1   45.20    1.93
   0   0  -1   51.41    2.34
   1   0   1  481.51   11.56
  -1   0  -1  501.01   12.37
   1  -1  -1  494.97   12.20
   0   1  -1  481.77   12.56
   1   0  -1  940.24   22.12
  -1   0   1  971.85   21.80
   1   0  -1  932.82   21.53
   0   1   1  938.58   21.61
  -1   1  -1 1000.00   21.74
   2   0   1  644.04   16.31
   0  -2   1  675.05   15.58
   0   2  -1  649.27   17.80
  -2   2   1  682.34   16.64
  -2   0  -1  697.47   17.62
   1   1  -1    7.58    0.93
  -2   1  -1    8.74    0.93
   1  -2  -1   10.91    1.44
   1   1   1    8.52    0.98
   1   1  -1    8.35    1.26
  -2   1   1    6.03    0.91
  -1  -1  -1    8.80    1.50
  -1   2  -1    8.37    1.19
  -1  -1   1    8.47    0.81
  -2   0   1  329.24    9.39
   0   2   1  347.08    9.07
   0  -2  -1  333.23   12.00
   2   0  -1  344.88    9.10
   2   0  -1  345.67    8.96
   0   2   1  352.46    8.96
  -2   2  -1  335.96    9.15
   0   3  -1    0.38    0.30
   0   3  -1    0.37    0.22
  -3   3   1    0.12    0.22
  -3   0  -1   -0.01    0.32
   2   1   1  257.46    7.54
   1   2  -1  252.74    7.69
  -3   2   1  251.32    8.30
   1   2  -1  246.44    9.09
  -3   1  -1  258.10    8.83
  -1   3  -1  247.03    8.61
  -2   3   1  260.09    7.71
  -2  -1  -1  250.53    9.18
   1  -3  -1  424.77   12.25
   2   1  -1  439.58   11.47
   1   2   1  423.86   11.43
  -3   1   1  432.33   12.42
   2   1  -1  421.58   11.46
  -3   2  -1  430.01   12.31
  -2   3  -1  432.90   11.13
  -2   3  -1  429.07   12.73
  -1  -2  -1  392.98   14.89
  -2  -1   1  411.01   12.16
  -1   3   1  427.48   11.79
   3   0  -1    0.10    0.19
  -3   3  -1    0.03    0.17
   3   0  -1    0.59    0.20
   0   3   1    0.27    0.18
   0  -3  -1   -0.54    0.34
  -3   0   1    0.30    0.25
  -4   0  -1  114.39    6.85
  -4   4   1  101.44    5.46
   0   4  -1  109.79    5.20
  -4   3   1  191.55    7.83
   3   1   1  193.26    6.76
   1   3  -1  186.80    6.98
  -4   1  -1  176.96    8.21
  -3   4   1  192.25    7.20
  -3  -1  -1  191.44    8.79
  -1   4  -1  188.10    8.23
   2   2   1    2.81    0.74
   2   2  -1    3.99    0.94
  -4   2  -1    0.09    0.26
  -2   4   1    1.24    0.51
  -2  -2  -1   -0.84    0.49
   3   1  -1  152.52    5.85
   1   3   1  137.01    5.58
  -4   1   1  143.44    7.10
  -4   3  -1  144.57    6.71
  -3   4  -1  146.89    7.08
  -3  -1   1  146.28    6.91
  -1   4   1  144.78    5.62
   0   4   1  136.15    5.71
  -4   4  -1  131.71    6.14
  -4   4  -1  140.75    7.36
  -4   0   1  135.51    7.31
  -3   5   1   85.98    5.40
   3   2  -1  105.27    5.16
  -3   5  -1   98.19    6.18
  -2   5   1   97.64    4.81
   0   0  -2  625.56   15.63
   0   0  -2  610.51   16.60
   0   1  -2  635.43   16.90
  -1   0  -2  637.57   16.34
   1  -1  -2  636.16   15.09
   1  -1  -2  628.31   16.34
  -1   0  -2  639.94   14.84
  -1   1  -2  430.08   10.53
   0  -1  -2  402.17   13.84
  -1   1  -2  402.05   10.87
  -1   0   2  413.97   10.21
   1   0  -2  410.98   11.20
   0   1   2  411.75    9.77
   1   0  -2  425.19    9.68
   0   2  -2  208.34    8.01
  -2   2   2  211.21    6.68
  -2   0  -2  206.66    7.63
   1   1  -2  418.46   13.40
   1   1  -2  422.73   11.21
  -2   1   2  459.94   11.84
  -2   1  -2  457.70   12.25
   1   1   2  456.43   11.10
   1  -2  -2  449.40   13.29
  -1   2   2  446.46   10.77
   2  -1  -2  445.58   11.55
  -1   2  -2  449.04   12.57
  -1   2  -2  433.49   10.63
  -1  -1  -2  435.08   13.58
  -1  -1   2  447.79   10.91
   2   0  -2  359.38    9.25
   2   0  -2  355.57    9.98
  -2   0   2  349.25    9.82
   0  -2  -2  329.53   13.36
   0   2   2  356.58    8.84
   0   2   2  359.98    9.19
  -2   2  -2  348.23   10.47
  -2   2  -2  361.46    9.83
  -3   0  -2  232.15    9.42
   0   3  -2  239.92    8.07
   0   3  -2  237.00   10.07
  -3   3   2  230.25    8.08
   1   2  -2  203.58    6.70
  -3   1  -2  195.06    7.56
  -3   2   2  203.24    7.25
   1   2  -2  183.59    8.49
   2  -3  -2  196.92    7.24
   2   1   2  205.33    6.27
  -1   3  -2  203.75    7.91
  -2  -1  -2  197.01    8.35
   2   1  -2  119.89    5.00
   1  -3  -2  120.50    5.78
  -3   2  -2  112.07    5.15
  -3   1   2  117.25    5.14
   1   2   2  109.83    4.20
   2   1  -2  118.75    4.49
   3  -1  -2  110.26    4.49
  -2  -1   2  114.86    4.69
  -1  -2  -2  121.52    7.44
  -2   3  -2  114.91    5.46
  -1   3   2  114.34    4.08
   3   0  -2  251.84    7.96
   3   0  -2  247.80    8.01
   0   3   2  255.19    7.67
  -3   3  -2  238.81    9.12
   0  -3  -2  244.51   10.92
  -3   3  -2  249.43    8.46
  -3   0   2  260.68    9.12
  -4   4   2   56.26    3.85
   0   4  -2   62.68    3.88
  -4   0  -2   60.36    4.86
  -4   1  -2   38.66    3.45
  -4   3   2   44.93    3.36
   1   3  -2   50.96    3.21
   3   1   2   44.35    2.79
  -3   4   2   42.77    2.97
  -1   4  -2   44.98    3.78
  -3  -1  -2   44.07    3.95
   2   2   2  187.27    6.56
  -4   2   2  173.15    7.72
   2   2  -2  191.61    7.08
  -4   2  -2  180.69    8.05
  -2   4   2  186.44    6.33
  -2   4  -2  183.57    8.24
  -2   4   2  189.24    7.24
  -2  -2  -2  184.48    9.72
  -4   1   2   83.61    5.21
   3   1  -2   87.63    4.27
   1   3   2   86.26    3.99
  -4   3  -2   88.76    5.13
  -4   3  -2   80.55    4.87
  -1   4   2   82.18    3.86
  -3   4  -2   87.53    5.37
  -4   0   2   35.46    3.30
   0   4   2   32.07    2.36
  -4   4  -2   25.63    3.54
  -2   5  -2   38.30    3.44
   3   2  -2   18.69    2.35
  -5   3  -2   20.28    2.68
   0   0  -3  153.91    5.60
   0   0  -3  154.13    6.45
   1  -1  -3  680.45   16.15
  -1   0  -3  650.76   17.76
   0   1  -3  645.64   15.61
   1  -1  -3  653.18   18.08
   0   1  -3  631.69   18.24
  -1   0  -3  650.50   16.06
   0   1   3  412.10    9.88
   1   0  -3  411.19   12.33
  -1   1  -3  403.46   11.58
   1   0  -3  419.10   11.09
   0  -1  -3  434.40   14.76
  -1   1  -3  430.57   11.42
   0  -1  -3  420.22   10.06
  -2   0  -3  281.48    7.57
   2  -2  -3  284.56    9.59
  -2   0  -3  291.30   10.13
   0   2  -3  283.23   10.61
   1   1  -3   60.52    4.08
   1   1   3   51.42    2.23
  -2   1  -3   57.32    3.28
   1   1  -3   61.77    2.63
  -2   1  -3   56.31    2.82
   1  -2  -3   66.71    4.55
  -1  -1   3   55.69    2.10
  -1   2  -3   58.14    2.22
  -1   2   3   55.97    1.96
  -1  -1  -3   57.86    4.19
   2  -1  -3   54.63    2.88
  -1   2  -3   59.86    3.53
   2   0  -3  410.36   12.16
   0   2   3  392.66   10.12
   2   0  -3  386.51   10.12
   0  -2  -3  399.16   15.54
  -2   2  -3  401.30   11.21
  -2   2  -3  404.20   12.12
  -2   0   3  394.64   10.98
  -3   0  -3   15.76    2.77
   0   3  -3   12.63    2.43
  -3   3   3   17.41    2.47
   2  -3  -3  233.27    9.18
  -3   1  -3  242.39    7.73
  -3   1  -3  229.01    9.04
  -3   2   3  235.79    8.40
   1   2  -3  257.73   10.53
   1   2  -3  241.93    7.98
   2   1   3  238.26    7.33
  -2  -1  -3  244.90   10.33
  -1   3  -3  241.64    9.50
   1   2   3  219.08    6.80
   1  -3  -3  237.12   10.22
  -3   1   3  223.57    8.08
  -3   2  -3  218.86    8.19
  -3   2  -3  225.88    8.06
   2   1  -3  234.51    7.30
   2   1  -3  232.17    8.85
   3  -1  -3  222.79    7.64
  -1  -2  -3  197.34   10.74
  -2   3  -3  221.62    8.81
  -1   3   3  218.55    6.49
  -3   3  -3   13.70    1.94
  -3   0   3   15.30    2.15
   3   0  -3   12.43    1.83
   0   3   3   13.24    1.54
  -3   3  -3   13.68    2.25
   0  -3  -3   14.11    3.21
  -4   4   3   68.18    4.42
  -4   0  -3   67.39    5.30
   0   4  -3   67.19    4.15
   3   1   3  121.43    5.05
  -4   3   3  117.70    6.07
   1   3  -3  122.91    5.75
   1   3  -3  110.87    6.87
  -4   1  -3  118.44    6.86
  -3   4   3  117.75    5.70
  -1   4  -3  116.86    7.00
  -3  -1  -3  123.43    7.60
   2  -4  -3    8.65    1.95
   2   2   3    8.05    1.30
   2   2  -3    7.91    1.46
   2   2  -3    7.32    1.54
  -4   2  -3    8.04    1.50
  -4   2  -3    7.62    1.77
  -4   2   3   10.08    2.14
  -2  -2  -3    7.51    2.30
  -2   4  -3    9.87    2.18
  -4   3  -3  104.24    5.81
   1   3   3  105.87    4.51
  -4   3  -3  111.69    5.93
  -4   1   3  102.08    5.76
   1  -4  -3  103.99    6.31
   3   1  -3  103.25    5.11
  -3   4  -3  107.55    6.35
  -1   4   3  105.87    4.35
  -1  -3  -3  112.61    8.15
   4   0  -3   95.90    4.72
  -4   4  -3  100.32    6.17
   0   4   3   96.45    4.45
   0   0  -4  766.58   22.09
   0   0  -4  849.65   21.00
   0   1  -4   96.60    5.28
   1  -1  -4   96.69    5.52
  -1   0  -4   91.37    4.06
  -1   0  -4  107.45    5.56
   0   1  -4   92.07    3.90
   1  -1  -4   99.47    4.27
  -1   1  -4    0.91    0.39
   1   0  -4    1.51    0.27
   0  -1  -4    4.23    0.72
   0  -1  -4    2.01    0.90
   1   0  -4    1.58    0.52
  -1   1  -4    2.00    0.58
   1   0  -4    1.85    0.76
   2  -2  -4    4.97    0.96
   0   2  -4    3.80    1.19
   2  -2  -4    6.36    1.65
  -2   0  -4    4.31    1.34
   1   1  -4  509.59   15.88
  -2   1  -4  502.24   14.77
   1  -2  -4  454.69   17.12
  -2   1  -4  479.67   13.59
   1   1   4  505.99   12.34
  -1   2  -4  500.67   15.33
  -1  -1  -4  457.97   17.04
   2  -1  -4  494.54   14.07
  -2   2  -4   82.45    4.56
  -2   0   4   84.51    3.84
  -2   2  -4   86.75    4.16
   0   2   4   83.58    3.01
   0  -2  -4   92.91    6.53
   2   0  -4   81.96    4.81
   0   3  -4  197.29    9.69
  -3   0  -4  190.46    9.25
  -3   3   4  192.95    7.84
   1   2  -4   68.63    3.63
   2  -3  -4   70.74    5.06
   1   2  -4   69.50    4.98
  -3   1  -4   49.59    3.89
  -3   2   4   63.12    3.85
   2   1   4   65.41    3.03
  -1   3  -4   63.42    4.70
  -2  -1  -4   62.09    5.14
  -3   2  -4    7.65    1.77
   1   2   4    5.22    0.84
  -3   1   4    6.96    1.53
   2   1  -4    5.24    1.35
  -3   2  -4    6.61    1.35
   1  -3  -4    6.28    1.99
  -1  -2  -4    5.72    1.93
   3  -1  -4    5.74    1.34
  -2   3  -4    6.61    1.59
   3   0  -4  206.06    8.32
   0   3   4  211.94    6.47
  -3   3  -4  208.96    8.91
  -3   0   4  198.00    7.73
   0  -3  -4  199.83   10.99
   0   4  -4   27.85    3.96
   1   3  -4    3.39    1.18
   1   3  -4    5.37    1.15
  -4   1  -4    5.09    1.48
  -4   3   4    5.80    1.63
  -1   4  -4    6.03    1.61
  -3   4   4    5.02    1.41
  -3  -1  -4    9.26    2.54
  -4   2   4  142.65    7.14
   2  -4  -4  147.10    8.00
   2   2   4  143.56    5.54
   2   2  -4  132.98    7.73
  -4   2  -4  135.07    7.44
  -2   4  -4  144.98    8.04
  -2  -2  -4  141.14    9.60
   1   3   4   40.35    2.50
   3   1  -4   43.25    3.56
  -4   3  -4   42.31    3.55
   1  -4  -4   45.92    4.45
  -4   1   4   44.64    3.67
  -4   3  -4   40.95    3.49
  -3   4  -4   42.10    3.95
   4  -1  -4   38.57    3.08
  -1  -3  -4   48.92    6.67
   4   0  -4    5.57    1.08
   0   0  -5    1.43    0.58
   0   0  -5    1.95    0.77
  -1   0  -5   69.32    3.44
   1  -1  -5   58.03    4.48
   1  -1  -5   56.23    3.62
  -1   0  -5   60.32    4.75
   0   1  -5   67.49    3.43
   0   1  -5   69.32    4.40
   1   0  -5  432.81   13.34
   1   0  -5  398.03   12.66
   0  -1  -5  421.85   14.89
   0  -1  -5  374.47   11.28
  -1   1  -5  409.71   13.23
  -1   1  -5  381.72   13.22
   2  -2  -5  268.77    8.76
  -2   0  -5  257.55   11.16
   0   2  -5  233.18   10.50
   2  -2  -5  243.07   10.87
   1  -2  -5    2.81    1.24
   1  -2  -5    3.01    0.66
   1   1  -5    3.01    1.00
  -2   1  -5    2.82    0.98
  -2   1  -5    2.68    0.68
  -1   2  -5    3.49    1.25
   2  -1  -5    1.99    0.71
  -1  -1  -5    3.59    1.55
  -2   2  -5   58.76    3.99
  -2   0   5   52.83    3.02
   0  -2  -5   61.76    5.26
   2   0  -5   49.30    3.93
   0   3  -5    3.44    1.16
  -3   3   5    2.92    1.08
  -3   0  -5    4.67    1.66
   2  -3  -5   45.88    4.58
   1   2  -5   48.44    4.04
  -3   1  -5   42.00    3.77
  -3   2   5   42.43    3.36
   3  -2  -5   48.98    3.51
  -1   3  -5   44.94    4.23
  -2  -1  -5   43.26    6.03
  -3   1   5  164.39    7.30
  -3   2  -5  173.47    7.49
  -3   2  -5  158.60    7.64
   2   1  -5  171.51    8.69
   1   2   5  172.08    5.71
   1  -3  -5  172.39   10.07
   3  -1  -5  166.73    7.68
  -2   3  -5  172.66    8.60
  -1  -2  -5  176.24   10.41
  -3   3  -5    3.35    1.12
   0  -3  -5    4.22    1.68
   3   0  -5    4.35    1.35
  -4   1  -5   86.74   11.67
   1   3  -5   80.16    5.58
  -1   4  -5   70.98    5.86
  -3   4   5   68.78    5.48
  -4   2   5    1.89    0.85
  -4   2  -5    5.22    1.26
   2   2   5    3.78    0.73
   2  -4  -5    6.85    1.97
   2   2  -5    5.14    1.36
  -2  -2  -5    3.16    1.29
  -2   4  -5    1.76    0.91
   1  -4  -5   23.41    4.09
   3   1  -5   30.39    4.00
   1   3   5   31.61    2.04
  -4   1   5   34.94    3.01
  -4   3  -5   34.32    3.16
   4  -1  -5   28.86    4.42
  -1  -3  -5   35.78    5.28
   0   0  -6   80.92    4.91
   0   0  -6   72.87    4.09
   0   1  -6  193.28    8.30
   1  -1  -6  187.98    7.79
  -1   0  -6  191.12    7.24
  -1   0  -6  190.64    9.78
   1  -1  -6  184.21    8.95
   1   0  -6   36.56    3.03
   1   0  -6   28.58    2.66
  -1   1  -6   34.03    3.05
  -1   1  -6   29.90    2.89
   0  -1  -6   29.95    4.08
  -2   0  -6   21.66    4.28
   2  -2  -6   15.95    3.30
   2  -2  -6   16.88    2.32
   0   2  -6   15.82    2.75
  -2   1  -6   64.88    4.99
   1  -2  -6   69.85    5.61
   1   1  -6   72.04    4.83
  -2   1  -6   63.63    4.11
   2  -1  -6   63.77    4.56
   2  -1  -6   52.47    4.01
  -1   2  -6   67.25    5.10
  -1  -1  -6   71.70    6.07
  -2   2  -6  114.15    6.54
   0  -2  -6  123.84    7.90
   2   0  -6  114.56    6.60
   0   3  -6   39.49    5.03
  -3   0  -6   41.16    5.80
  -3   1  -6   72.07    5.65
   1   2  -6   82.67    5.49
   2  -3  -6   76.20    6.46
  -2  -1  -6   75.07    6.87
   3  -2  -6   70.11    4.75
  -1   3  -6   63.98    5.58
   1  -3  -6    9.40    2.62
  -3   1   6    8.09    1.84
  -3   2  -6    8.12    1.80
  -3   2  -6    8.28    1.46
   2   1  -6   13.89    2.76
   3  -1  -6    7.71    2.02
  -1  -2  -6    7.09    2.23
  -2   3  -6    9.99    2.36
  -3   3  -6   46.20    4.12
   0  -3  -6   47.32    6.34
   3   0  -6   41.64    3.95
   0   0  -7   56.29    4.14
   0   0  -7   63.55    3.93
  -1   0  -7   58.06    4.98
   1  -1  -7   60.91    3.89
   0   1  -7   50.25    3.90
   1  -1  -7   60.05    4.61
   0  -1  -7   47.63    4.25
   1   0  -7   47.45    3.54
  -1   1  -7   45.17    3.58
   0   2  -7   32.37    4.19
   2  -2  -7   42.30    4.23
   2  -2  -7   33.05    2.90
  -2   0  -7   40.19    6.26
  -2   1  -7   33.57    5.23
   1   1  -7   35.98    3.41
   1  -2  -7   30.57    4.62
  -1  -1  -7   34.92    5.49
   2  -1  -7   27.53    3.40
  -1   2  -7   32.20    4.44
   2  -1  -7   29.94    3.10
   2   0  -7   40.22    3.65
   0  -2  -7   34.11    5.13
  -2   2  -7   31.58    4.25
   1   2  -7   27.34    5.19
  -3   1  -7   28.05    4.70
  -3   2   7   14.14    2.68
   3  -2  -7   16.99    2.63
   3  -1  -7   28.97    5.39
  -2   3  -7   35.93    4.73
   0   0  -8   74.94    5.27
   0   0  -8   68.22    4.08
   1  -1  -8    8.57    2.11
   0   1  -8    8.10    1.71
   1  -1  -8   12.32    1.81
  -1   0  -8   12.43    2.71
   0  -1  -8    8.12    2.15
   1   0  -8    7.39    1.55
  -1   1  -8    7.40    1.49
   2  -2  -8    6.22    2.03
  -2   0  -8    7.40    1.85
   1   1  -8   43.23    3.62
   1  -2  -8   41.69    3.96
  -1   2  -8   38.79    3.77
   2  -1  -8   45.03    3.49
  -1  -1  -8   43.66    4.40
  -2   2  -8    8.93    1.57
   1  -1  -9    0.50    0.55
   0   0   0    0.00    0.00
;
_shelx_hkl_checksum   40612
