# Supplementary material
Source: MDPI journal article supplement (https://www.mdpi.com/2304-6740/11/12/481)
Supplement: s1 [file s1 › V1.13Se0.72Te1.28_final.cif]

 
data_shelx
 
_audit_creation_method            'SHELXL-2018/1'
_shelx_SHELXL_version_number      '2018/1'
_chemical_name_systematic         ?
_chemical_name_common             ?
_chemical_melting_point           ?
_chemical_formula_moiety          ?
_chemical_formula_sum
 'Se0.72 Te1.28 V1.13' 
_chemical_formula_weight          277.74

loop_
 _atom_type_symbol
 _atom_type_description
 _atom_type_scat_dispersion_real
 _atom_type_scat_dispersion_imag
 _atom_type_scat_source
 'V'  'V'   0.3005   0.5294
 'International Tables Vol C Tables 4.2.6.8 and 6.1.1.4'
 'Se'  'Se'  -0.0929   2.2259
 'International Tables Vol C Tables 4.2.6.8 and 6.1.1.4'
 'Te'  'Te'  -0.5308   1.6751
 'International Tables Vol C Tables 4.2.6.8 and 6.1.1.4'
 
_space_group_crystal_system       trigonal
_space_group_IT_number            164
_space_group_name_H-M_alt         'P -3 m 1'
_space_group_name_Hall            '-P 3 2"'
 
_shelx_space_group_comment
;
The symmetry employed for this shelxl refinement is uniquely defined
by the following loop, which should always be used as a source of
symmetry information in preference to the above space-group names.
They are only intended as comments.
;
 
loop_
 _space_group_symop_operation_xyz
 'x, y, z'
 '-y, x-y, z'
 '-x+y, -x, z'
 'y, x, -z'
 'x-y, -y, -z'
 '-x, -x+y, -z'
 '-x, -y, -z'
 'y, -x+y, -z'
 'x-y, x, -z'
 '-y, -x, z'
 '-x+y, y, z'
 'x, x-y, z'
 
_cell_length_a                    3.6259(14)
_cell_length_b                    3.6259(14)
_cell_length_c                    6.290(2)
_cell_angle_alpha                 90
_cell_angle_beta                  90
_cell_angle_gamma                 120
_cell_volume                      71.62(6)
_cell_formula_units_Z             1
_cell_measurement_temperature     293(2)
_cell_measurement_reflns_used     582
_cell_measurement_theta_min       3.239
_cell_measurement_theta_max       29.770
 
_exptl_crystal_description        hexagonal
_exptl_crystal_colour             black
_exptl_crystal_density_meas       ?
_exptl_crystal_density_method     ?
_exptl_crystal_density_diffrn     6.441          
_exptl_crystal_F_000              117
_exptl_transmission_factor_min    ?
_exptl_transmission_factor_max    ?
_exptl_crystal_size_max           0.06
_exptl_crystal_size_mid           0.05
_exptl_crystal_size_min           0.04
_exptl_absorpt_coefficient_mu     25.541
_shelx_estimated_absorpt_T_min    ?
_shelx_estimated_absorpt_T_max    ?
_exptl_absorpt_correction_type    multi-scan
_exptl_absorpt_correction_T_min   0.5243
_exptl_absorpt_correction_T_max   0.7460
_exptl_absorpt_process_details    'SADABAS, R. H. Blessing, Acta Crystallogr. A 1995, 51, 33'
_exptl_absorpt_special_details    ?
_diffrn_ambient_temperature       293(2)
_diffrn_radiation_wavelength      0.71073
_diffrn_radiation_type            MoK\a
_diffrn_source                    'fine-focus sealed tube'
_diffrn_measurement_device_type   'Bruker APEX CCD'
_diffrn_measurement_method        ?
_diffrn_detector_area_resol_mean  ?
_diffrn_reflns_number             1049
_diffrn_reflns_av_unetI/netI      0.0131
_diffrn_reflns_av_R_equivalents   0.0247
_diffrn_reflns_limit_h_min        -5
_diffrn_reflns_limit_h_max        4
_diffrn_reflns_limit_k_min        -5
_diffrn_reflns_limit_k_max        5
_diffrn_reflns_limit_l_min        -8
_diffrn_reflns_limit_l_max        8
_diffrn_reflns_theta_min          3.239
_diffrn_reflns_theta_max          30.402
_diffrn_reflns_theta_full         25.242
_diffrn_measured_fraction_theta_max   0.982
_diffrn_measured_fraction_theta_full  1.000
_diffrn_reflns_Laue_measured_fraction_max    0.982
_diffrn_reflns_Laue_measured_fraction_full   1.000
_diffrn_reflns_point_group_measured_fraction_max   0.982
_diffrn_reflns_point_group_measured_fraction_full  1.000
_reflns_number_total              108
_reflns_number_gt                 103
_reflns_threshold_expression      'I > 2\s(I)'
_reflns_Friedel_coverage          0.000
_reflns_Friedel_fraction_max      .
_reflns_Friedel_fraction_full     .
 
_reflns_special_details
;
 Reflections were merged by SHELXL according to the crystal
 class for the calculation of statistics and refinement.
 
 _reflns_Friedel_fraction is defined as the number of unique
 Friedel pairs measured divided by the number that would be
 possible theoretically, ignoring centric projections and
 systematic absences.
;
 
_computing_data_collection        ?
_computing_cell_refinement        ?
_computing_data_reduction         ?
_computing_structure_solution     ?
_computing_structure_refinement 'SHELXL-2018/1 (Sheldrick, 2018)'
_computing_molecular_graphics     ?
_computing_publication_material   ?
_refine_special_details           ?
_refine_ls_structure_factor_coef  Fsqd
_refine_ls_matrix_type            full
_refine_ls_weighting_scheme       calc
_refine_ls_weighting_details
'w=1/[\s^2^(Fo^2^)+(0.0240P)^2^+0.2441P] where P=(Fo^2^+2Fc^2^)/3'
_atom_sites_solution_primary      ?
_atom_sites_solution_secondary    ?
_atom_sites_solution_hydrogens    .
_refine_ls_hydrogen_treatment     undef
_refine_ls_extinction_method      none
_refine_ls_extinction_coef        .
_refine_ls_number_reflns          108
_refine_ls_number_parameters      11
_refine_ls_number_restraints      0
_refine_ls_R_factor_all           0.0222
_refine_ls_R_factor_gt            0.0204
_refine_ls_wR_factor_ref          0.0491
_refine_ls_wR_factor_gt           0.0482
_refine_ls_goodness_of_fit_ref    1.208
_refine_ls_restrained_S_all       1.208
_refine_ls_shift/su_max           0.000
_refine_ls_shift/su_mean          0.000
 
loop_
 _atom_site_label
 _atom_site_type_symbol
 _atom_site_fract_x
 _atom_site_fract_y
 _atom_site_fract_z
 _atom_site_U_iso_or_equiv
 _atom_site_adp_type
 _atom_site_occupancy
 _atom_site_site_symmetry_order  
 _atom_site_calc_flag
 _atom_site_refinement_flags_posn
 _atom_site_refinement_flags_adp
 _atom_site_refinement_flags_occupancy
 _atom_site_disorder_assembly
 _atom_site_disorder_group
V1 V 0.000000 0.000000 0.000000 0.0582(13) Uani 1 12 d S T P . .
V2 V 0.000000 0.000000 0.500000 0.028(6) Uani 0.128(11) 12 d S T . . .
Se Se 0.333333 0.666667 0.235(3) 0.0212(7) Uani 0.36(3) 6 d S T P . .
Te Te 0.333333 0.666667 0.2652(11) 0.0212(7) Uani 0.64(3) 6 d S T P . .
 
loop_
 _atom_site_aniso_label
 _atom_site_aniso_U_11
 _atom_site_aniso_U_22
 _atom_site_aniso_U_33
 _atom_site_aniso_U_23
 _atom_site_aniso_U_13
 _atom_site_aniso_U_12
V1 0.076(2) 0.076(2) 0.0222(14) 0.000 0.000 0.0381(10)
V2 0.032(8) 0.032(8) 0.020(9) 0.000 0.000 0.016(4)
Se 0.0150(3) 0.0150(3) 0.0338(19) 0.000 0.000 0.00748(14)
Te 0.0150(3) 0.0150(3) 0.0338(19) 0.000 0.000 0.00748(14)
 
_geom_special_details
;
 All esds (except the esd in the dihedral angle between two l.s. planes)
 are estimated using the full covariance matrix.  The cell esds are taken
 into account individually in the estimation of esds in distances, angles
 and torsion angles; correlations between esds in cell parameters are only
 used when they are defined by crystal symmetry.  An approximate (isotropic)
 treatment of cell esds is used for estimating esds involving l.s. planes.
;
 
loop_
 _geom_bond_atom_site_label_1
 _geom_bond_atom_site_label_2
 _geom_bond_distance
 _geom_bond_site_symmetry_2
 _geom_bond_publ_flag
V1 Se 2.562(11) 7 ?
V1 Se 2.562(11) 7_665 ?
V1 Se 2.562(11) 1_445 ?
V1 Se 2.562(11) . ?
V1 Se 2.562(11) 7_565 ?
V1 Se 2.562(11) 1_545 ?
V1 Te 2.677(5) 7 ?
V1 Te 2.677(5) 7_665 ?
V1 Te 2.677(5) 1_445 ?
V1 Te 2.677(5) . ?
V1 Te 2.677(5) 1_545 ?
V1 Te 2.677(5) 7_565 ?
V2 Te 2.562(4) 7_666 ?
V2 Te 2.562(4) 1_445 ?
V2 Te 2.562(4) 7_556 ?
V2 Te 2.562(4) . ?
V2 Te 2.562(4) 7_566 ?
V2 Te 2.562(4) 1_545 ?
V2 Se 2.677(12) 1_445 ?
V2 Se 2.677(12) 7_666 ?
V2 Se 2.677(12) . ?
V2 Se 2.677(12) 7_556 ?
V2 Se 2.677(12) 7_566 ?
V2 Se 2.677(12) 1_545 ?
 
loop_
 _geom_angle_atom_site_label_1
 _geom_angle_atom_site_label_2
 _geom_angle_atom_site_label_3
 _geom_angle
 _geom_angle_site_symmetry_1
 _geom_angle_site_symmetry_3
 _geom_angle_publ_flag
Se V1 Se 90.1(5) 7 7_665 ?
Se V1 Se 89.9(5) 7 1_445 ?
Se V1 Se 180.0 7_665 1_445 ?
Se V1 Se 180.0 7 . ?
Se V1 Se 89.9(5) 7_665 . ?
Se V1 Se 90.1(5) 1_445 . ?
Se V1 Se 90.1(5) 7 7_565 ?
Se V1 Se 90.1(5) 7_665 7_565 ?
Se V1 Se 89.9(5) 1_445 7_565 ?
Se V1 Se 89.9(5) . 7_565 ?
Se V1 Se 89.9(5) 7 1_545 ?
Se V1 Se 89.9(5) 7_665 1_545 ?
Se V1 Se 90.1(5) 1_445 1_545 ?
Se V1 Se 90.1(5) . 1_545 ?
Se V1 Se 180.0 7_565 1_545 ?
Se V1 Te 3.3(4) 7 7 ?
Se V1 Te 87.7(2) 7_665 7 ?
Se V1 Te 92.3(2) 1_445 7 ?
Se V1 Te 176.7(4) . 7 ?
Se V1 Te 87.7(2) 7_565 7 ?
Se V1 Te 92.3(2) 1_545 7 ?
Se V1 Te 87.7(2) 7 7_665 ?
Se V1 Te 3.3(4) 7_665 7_665 ?
Se V1 Te 176.7(4) 1_445 7_665 ?
Se V1 Te 92.3(2) . 7_665 ?
Se V1 Te 87.7(2) 7_565 7_665 ?
Se V1 Te 92.3(2) 1_545 7_665 ?
Te V1 Te 85.27(18) 7 7_665 ?
Se V1 Te 92.3(2) 7 1_445 ?
Se V1 Te 176.7(4) 7_665 1_445 ?
Se V1 Te 3.3(4) 1_445 1_445 ?
Se V1 Te 87.7(2) . 1_445 ?
Se V1 Te 92.3(2) 7_565 1_445 ?
Se V1 Te 87.7(2) 1_545 1_445 ?
Te V1 Te 94.73(18) 7 1_445 ?
Te V1 Te 180.0 7_665 1_445 ?
Se V1 Te 176.7(4) 7 . ?
Se V1 Te 92.3(2) 7_665 . ?
Se V1 Te 87.7(2) 1_445 . ?
Se V1 Te 3.3(4) . . ?
Se V1 Te 92.3(2) 7_565 . ?
Se V1 Te 87.7(2) 1_545 . ?
Te V1 Te 180.0(2) 7 . ?
Te V1 Te 94.73(18) 7_665 . ?
Te V1 Te 85.27(18) 1_445 . ?
Se V1 Te 92.3(2) 7 1_545 ?
Se V1 Te 92.3(2) 7_665 1_545 ?
Se V1 Te 87.7(2) 1_445 1_545 ?
Se V1 Te 87.7(2) . 1_545 ?
Se V1 Te 176.7(4) 7_565 1_545 ?
Se V1 Te 3.3(4) 1_545 1_545 ?
Te V1 Te 94.73(18) 7 1_545 ?
Te V1 Te 94.73(18) 7_665 1_545 ?
Te V1 Te 85.27(18) 1_445 1_545 ?
Te V1 Te 85.27(18) . 1_545 ?
Se V1 Te 87.7(2) 7 7_565 ?
Se V1 Te 87.7(2) 7_665 7_565 ?
Se V1 Te 92.3(2) 1_445 7_565 ?
Se V1 Te 92.3(2) . 7_565 ?
Se V1 Te 3.3(4) 7_565 7_565 ?
Se V1 Te 176.7(4) 1_545 7_565 ?
Te V1 Te 85.27(18) 7 7_565 ?
Te V1 Te 85.27(18) 7_665 7_565 ?
Te V1 Te 94.73(18) 1_445 7_565 ?
Te V1 Te 94.73(18) . 7_565 ?
Te V1 Te 180.0 1_545 7_565 ?
Te V2 Te 180.0 7_666 1_445 ?
Te V2 Te 90.08(19) 7_666 7_556 ?
Te V2 Te 89.92(19) 1_445 7_556 ?
Te V2 Te 89.92(19) 7_666 . ?
Te V2 Te 90.08(19) 1_445 . ?
Te V2 Te 180.0 7_556 . ?
Te V2 Te 90.08(19) 7_666 7_566 ?
Te V2 Te 89.92(19) 1_445 7_566 ?
Te V2 Te 90.08(19) 7_556 7_566 ?
Te V2 Te 89.92(19) . 7_566 ?
Te V2 Te 89.92(19) 7_666 1_545 ?
Te V2 Te 90.08(19) 1_445 1_545 ?
Te V2 Te 89.92(19) 7_556 1_545 ?
Te V2 Te 90.08(19) . 1_545 ?
Te V2 Te 180.0 7_566 1_545 ?
Te V2 Se 176.7(4) 7_666 1_445 ?
Te V2 Se 3.3(4) 1_445 1_445 ?
Te V2 Se 92.3(2) 7_556 1_445 ?
Te V2 Se 87.7(2) . 1_445 ?
Te V2 Se 92.3(2) 7_566 1_445 ?
Te V2 Se 87.7(2) 1_545 1_445 ?
Te V2 Se 3.3(4) 7_666 7_666 ?
Te V2 Se 176.7(4) 1_445 7_666 ?
Te V2 Se 87.7(2) 7_556 7_666 ?
Te V2 Se 92.3(2) . 7_666 ?
Te V2 Se 87.7(2) 7_566 7_666 ?
Te V2 Se 92.3(2) 1_545 7_666 ?
Se V2 Se 180.0(6) 1_445 7_666 ?
Te V2 Se 92.3(2) 7_666 . ?
Te V2 Se 87.7(2) 1_445 . ?
Te V2 Se 176.7(4) 7_556 . ?
Te V2 Se 3.3(4) . . ?
Te V2 Se 92.3(2) 7_566 . ?
Te V2 Se 87.7(2) 1_545 . ?
Se V2 Se 85.3(5) 1_445 . ?
Se V2 Se 94.7(5) 7_666 . ?
Te V2 Se 87.7(2) 7_666 7_556 ?
Te V2 Se 92.3(2) 1_445 7_556 ?
Te V2 Se 3.3(4) 7_556 7_556 ?
Te V2 Se 176.7(4) . 7_556 ?
Te V2 Se 87.7(2) 7_566 7_556 ?
Te V2 Se 92.3(2) 1_545 7_556 ?
Se V2 Se 94.7(5) 1_445 7_556 ?
Se V2 Se 85.3(5) 7_666 7_556 ?
Se V2 Se 180.0 . 7_556 ?
Te V2 Se 87.7(2) 7_666 7_566 ?
Te V2 Se 92.3(2) 1_445 7_566 ?
Te V2 Se 87.7(2) 7_556 7_566 ?
Te V2 Se 92.3(2) . 7_566 ?
Te V2 Se 3.3(4) 7_566 7_566 ?
Te V2 Se 176.7(4) 1_545 7_566 ?
Se V2 Se 94.7(5) 1_445 7_566 ?
Se V2 Se 85.3(5) 7_666 7_566 ?
Se V2 Se 94.7(5) . 7_566 ?
Se V2 Se 85.3(5) 7_556 7_566 ?
Te V2 Se 92.3(2) 7_666 1_545 ?
Te V2 Se 87.7(2) 1_445 1_545 ?
Te V2 Se 92.3(2) 7_556 1_545 ?
Te V2 Se 87.7(2) . 1_545 ?
Te V2 Se 176.7(4) 7_566 1_545 ?
Te V2 Se 3.3(4) 1_545 1_545 ?
Se V2 Se 85.3(5) 1_445 1_545 ?
Se V2 Se 94.7(5) 7_666 1_545 ?
Se V2 Se 85.3(5) . 1_545 ?
Se V2 Se 94.7(5) 7_556 1_545 ?
Se V2 Se 180.0 7_566 1_545 ?
V1 Se V1 90.1(5) 1_565 . ?
V1 Se V1 90.1(5) 1_565 1_665 ?
V1 Se V1 90.1(5) . 1_665 ?
V1 Se V2 132.75(5) 1_565 1_665 ?
V1 Se V2 132.75(5) . 1_665 ?
V1 Se V2 73.76(4) 1_665 1_665 ?
V1 Se V2 73.76(4) 1_565 1_565 ?
V1 Se V2 132.75(5) . 1_565 ?
V1 Se V2 132.75(5) 1_665 1_565 ?
V2 Se V2 85.3(5) 1_665 1_565 ?
V1 Se V2 132.75(5) 1_565 . ?
V1 Se V2 73.76(4) . . ?
V1 Se V2 132.75(5) 1_665 . ?
V2 Se V2 85.3(5) 1_665 . ?
V2 Se V2 85.3(5) 1_565 . ?
V2 Te V2 90.08(19) 1_665 1_565 ?
V2 Te V2 90.08(19) 1_665 . ?
V2 Te V2 90.08(19) 1_565 . ?
V2 Te V1 132.75(2) 1_665 . ?
V2 Te V1 132.75(2) 1_565 . ?
V2 Te V1 73.76(3) . . ?
V2 Te V1 132.75(2) 1_665 1_565 ?
V2 Te V1 73.76(3) 1_565 1_565 ?
V2 Te V1 132.75(2) . 1_565 ?
V1 Te V1 85.27(18) . 1_565 ?
V2 Te V1 73.76(3) 1_665 1_665 ?
V2 Te V1 132.75(2) 1_565 1_665 ?
V2 Te V1 132.75(2) . 1_665 ?
V1 Te V1 85.27(18) . 1_665 ?
V1 Te V1 85.27(18) 1_565 1_665 ?
 
_refine_diff_density_max    1.454
_refine_diff_density_min   -1.198
_refine_diff_density_rms    0.218

_shelx_res_file
;
TITL VSeTe, P-3m1, V1/V2 Se/Te EADP ANIS, SOF(V2) free, Se/Te mixed
    shelx.res
    created by SHELXL-2018/1 at 09:26:07 on 10-Jul-2023

CELL 0.71073   3.62590   3.62590   6.29040  90.0000  90.0000 120.0000
ZERR    1.00   0.00140   0.00140   0.00240   0.0000   0.0000   0.0000
LATT  1
SYMM -Y, X-Y, Z
SYMM -X+Y, -X, Z
SYMM Y, X, -Z
SYMM X-Y, -Y, -Z
SYMM -X, -X+Y, -Z
SFAC V SE TE
UNIT 1.15 0.74 1.26
LIST 4
L.S. 10
ACTA
FMAP 2
PLAN 20

EADP SE TE

WGHT    0.024000    0.244100
FVAR       0.40394   0.63928
V1    1    0.000000    0.000000    0.000000    10.08333    0.07620    0.07620 =
         0.02220    0.00000    0.00000    0.03810
V2    1    0.000000    0.000000    0.500000     0.01064    0.03225    0.03225 =
         0.02045    0.00000    0.00000    0.01612
SE    2    0.333333    0.666667    0.234779   -20.16667    0.01496    0.01496 =
         0.03378    0.00000    0.00000    0.00748
TE    3    0.333333    0.666667    0.265153    20.16667    0.01496    0.01496 =
         0.03378    0.00000    0.00000    0.00748
HKLF 4


REM  VSeTe, P-3m1, V1/V2 Se/Te EADP ANIS, SOF(V2) free, Se/Te mixed
REM R1 =  0.0204 for     103 Fo > 4sig(Fo)  and  0.0222 for all     108 data
REM     11 parameters refined using      0 restraints

END

WGHT      0.0205      0.3647

REM Highest difference peak  1.454,  deepest hole -1.198,  1-sigma level  0.218
Q1    1   0.3333  0.6667  0.0341  10.16667  0.05    1.45
Q2    1   0.4178  0.8355  0.3308  10.50000  0.05    0.67
Q3    1   0.0816  0.1632 -0.2229  10.50000  0.05    0.52
Q4    1   0.2028  0.4057  0.1122  10.50000  0.05    0.49
Q5    1   0.6667  0.3333  0.3560  10.16667  0.05    0.48
Q6    1   0.1032  0.6587  0.2562  11.00000  0.05    0.48
Q7    1   0.1443  0.5722  0.1089  10.50000  0.05    0.47
Q8    1  -0.3809  0.0000  0.0000  10.50000  0.05    0.46
Q9    1  -0.1705  0.1705  0.3151  10.50000  0.05    0.46
Q10   1   0.2039  0.4079 -0.0457  10.50000  0.05    0.41
Q11   1   0.2548  0.5095  0.3795  10.50000  0.05    0.38
Q12   1   0.3108  0.4477  0.5515  11.00000  0.05    0.37
Q13   1  -0.2903  0.0000  0.5000  10.50000  0.05    0.32
Q14   1   0.6667  0.3333  0.2227  10.16667  0.05    0.28
Q15   1  -0.1480  0.4260  0.0854  10.50000  0.05    0.28
Q16   1  -0.0093  0.3797  0.3267  11.00000  0.05    0.28
Q17   1   0.0000  0.0000  0.6800  10.16667  0.05    0.23
Q18   1  -0.0932  0.0932  0.4262  10.50000  0.05    0.22
Q19   1   0.6519  1.0853  0.1877  11.00000  0.05    0.20
Q20   1   0.1464  0.2929  0.4002  10.50000  0.05    0.08
;
_shelx_res_checksum   57009

_shelx_hkl_file
;
   0   1   0   60.88    1.53
   1  -1   0   59.72    1.93
   1   0   0   61.45    1.50
   1   0   0   59.01    1.60
   1   0   0   60.24    2.04
  -1   1   0   59.16    1.68
  -1   1   0   59.84    1.29
   0  -1   0   64.04    2.19
   0   1   0   59.95    1.93
  -1   0   0   58.74    1.45
  -2   1   0  824.88   11.21
   1   1   0  807.82   11.93
   1  -2   0  798.97   11.96
   1   1   0  758.06   13.42
   1   1   0  741.26   11.72
  -1   2   0  810.51   11.91
   2  -1   0  780.23   12.53
  -1   2   0  808.64   11.29
   0  -2   0   63.29    2.93
   2  -2   0   50.73    2.48
   2   0   0   48.94    2.67
   0   2   0   51.00    1.96
   2  -2   0   51.98    2.02
  -2   2   0   51.77    2.14
  -2   2   0   50.42    1.54
  -2   0   0   50.46    1.77
   0   2   0   47.17    2.43
   2   1   0   37.11    2.98
   2  -3   0   42.78    2.63
   1   2   0   41.20    2.34
   2  -3   0   41.54    2.54
  -3   1   0   44.10    2.04
  -3   2   0   41.94    2.19
  -3   2   0   42.60    1.93
   1   2   0   43.43    2.63
  -3   1   0   41.27    2.15
   1  -3   0   39.37    2.40
   2   1   0   43.08    2.31
  -2  -1   0   41.64    1.86
  -1  -2   0   44.01    1.70
  -2  -1   0   41.53    1.97
   3  -1   0   42.94    2.90
  -1   3   0   39.89    2.46
  -1   3   0   44.08    2.18
  -2   3   0   43.71    2.30
   3  -2   0   42.57    2.79
  -1  -2   0   40.97    3.14
  -3   0   0  266.48    6.25
   0   3   0  261.65    7.32
  -3   0   0  260.29    5.60
   0   3   0  262.47    6.34
   3  -3   0  266.47    7.46
   3   0   0  271.48    8.24
   0  -3   0  263.05    7.39
  -3   3   0  268.17    6.50
   2  -4   0  168.01    5.96
   2  -4   0  174.06    6.27
  -4   2   0  155.82    4.81
   2   2   0  162.94    5.58
  -4   2   0  169.58    5.06
  -2   4   0  168.86    5.31
   4  -2   0  172.85    6.73
  -2  -2   0  173.51    4.60
   1   3   0   25.40    2.43
   3   1   0   34.45    4.17
  -4   3   0   27.60    2.12
   3  -4   0   26.88    3.00
  -4   1   0   30.95    2.18
   1  -4   0   28.46    3.03
  -1   4   0   28.47    2.10
  -1  -3   0   32.08    4.01
  -1   4   0   26.20    2.57
   4  -3   0   30.88    3.88
  -3  -1   0   23.96    1.83
  -3   4   0   27.74    2.17
   4  -1   0   30.60    4.19
   0  -4   0   21.53    2.93
  -4   0   0   28.35    3.19
   0   4   0   26.46    4.00
   4   0   0   24.26    3.42
  -4   4   0   27.75    3.25
   4  -4   0   23.40    3.24
   0   4   0   23.21    3.33
  -5   3   0   18.60    2.56
  -5   2   0   19.09    2.59
   2  -5   0   20.56    3.73
   2  -5   0   20.70    2.79
   2   3   0   21.02    3.18
   3  -5   0   18.45    2.65
  -2   5   0   17.51    2.34
  -2  -3   0   13.43    2.52
   0   0  -1   33.95    1.36
   0   0   1   33.68    0.94
   0   0   1   33.33    1.03
   0  -1   1  359.62    4.86
   0   1  -1  364.17    6.24
   1  -1  -1  369.10    6.06
   1  -1  -1  352.17    5.72
   1   0   1  360.37    5.40
   0   1  -1  352.74    4.95
  -1   1   1  357.34    5.10
  -1   1   1  359.00    5.36
  -1   0  -1  364.90    5.79
   0  -1   1  350.84    6.78
   1   0   1  356.45    5.81
   0   1   1  991.65   11.86
  -1   1  -1  983.98   12.65
   0  -1  -1  951.31   12.48
   1  -1   1  968.07   11.85
  -1   0   1  991.16   12.48
   1  -1   1  976.70   13.29
   1   0  -1  994.75   13.28
  -1   1  -1 1000.00   12.29
   0   1   1  966.77   12.65
   1   0  -1  966.55   13.52
   2  -2  -1  448.97    8.22
   0   2  -1  453.48    8.84
   0   2  -1  445.52    7.16
   2   0   1  434.86    8.90
  -2   0  -1  452.89    7.71
   0  -2   1  452.40    9.68
  -2   2   1  460.18    7.72
  -2   2   1  442.59    6.75
   2  -2  -1  452.11    8.48
   2   0   1  454.80    7.62
  -2   1   1    6.82    1.02
   1   1   1    5.70    1.22
   1   1   1    4.31    0.91
   1   1  -1    5.28    1.15
   1   1   1    5.60    0.85
   1  -2  -1    5.60    1.23
   1   1  -1    5.81    1.38
   1   1   1    5.34    1.08
  -2   1  -1    5.36    0.90
   1  -2   1    5.76    1.13
   1  -2  -1    5.88    0.96
  -2   1   1    4.67    0.71
  -1  -1   1    5.38    0.80
   2  -1   1    5.24    0.84
  -1   2   1    4.44    0.79
   2  -1   1    5.45    1.14
   2  -1  -1    5.73    1.13
   2  -1  -1    5.71    1.11
  -1   2  -1    6.58    1.16
  -1   2  -1    4.80    0.82
   2   0  -1  231.21    6.19
  -2   0   1  237.05    4.95
   2   0  -1  228.32    5.03
   2  -2   1  228.07    5.84
   0   2   1  231.42    5.06
  -2   2  -1  231.74    5.15
   0   2   1  229.93    5.69
   2  -2   1  232.94    4.02
   0  -2  -1  231.90    5.28
  -2   0   1  237.17    4.01
   3   0   1   -1.21    0.88
   3  -3  -1   -0.61    0.39
   3  -3  -1   -0.22    0.44
  -3   3   1    0.54    0.40
   0   3  -1    0.14    0.34
   0   3  -1    0.10    0.50
  -3   0  -1    0.25    0.33
   0  -3   1    1.24    0.73
   2   1   1  162.22    4.33
   2  -3  -1  165.08    4.92
  -3   2   1  158.44    4.14
   1   2  -1  162.33    5.30
  -3   2   1  156.54    4.26
   1  -3   1  165.79    5.56
   2  -3  -1  158.13    5.07
  -3   1  -1  160.77    4.44
   2   1   1  162.09    5.96
   1   2  -1  152.63    4.32
   2   1   1  160.12    4.37
   3  -2  -1  165.33    5.56
  -2   3   1  161.74    4.53
   3  -1   1  158.09    5.57
   3  -1   1  165.31    4.45
  -1  -2   1  167.58    3.79
  -1   3  -1  161.14    4.32
  -1   3  -1  165.58    5.26
  -2  -1  -1  163.19    4.69
  -1  -2   1  152.09    6.26
  -3   1   1  258.06    5.83
   2   1  -1  246.77    6.30
   1  -3  -1  248.14    6.00
   1   2   1  254.42    6.54
   1   2   1  246.93    4.97
   1  -3  -1  243.20    6.94
  -3   2  -1  248.38    5.98
   2  -3   1  248.43    6.87
   1   2   1  252.86    6.53
  -3   1   1  244.89    5.14
   2   1  -1  247.92    7.86
  -2   3  -1  246.40    5.93
  -1   3   1  247.73    5.86
  -2  -1   1  241.31    5.40
  -1  -2  -1  250.25    7.14
   3  -2   1  248.66    7.10
   3  -1  -1  250.29    7.28
  -2   3  -1  254.04    6.00
   3   0  -1    0.16    0.68
  -3   0   1    0.44    0.44
   0   3   1   -0.65    0.48
   0   3   1    0.09    0.41
  -3   3  -1    1.34    0.67
   0  -3  -1   -0.39    0.47
   3  -3   1    0.22    0.64
   4  -4  -1   64.34    4.16
   4   0   1   64.98    4.58
   0  -4   1   69.28    4.73
   0   4  -1   66.13    4.29
  -4   0  -1   64.08    3.35
  -4   4   1   63.16    3.44
   1   3  -1   98.12    4.78
   3  -4  -1   99.03    4.52
   1  -4   1  109.82    5.17
  -4   1  -1   98.38    3.89
   3  -4  -1   98.64    4.46
  -4   1  -1   97.10    3.92
  -4   3   1   95.69    3.86
   3   1   1  100.85    5.41
  -3  -1  -1  106.83    3.96
  -1   4  -1   97.64    4.74
   4  -1   1  108.73    5.60
  -1  -3   1  101.99    5.65
  -1   4  -1   99.69    3.90
   4  -3  -1  100.15    5.19
  -3   4   1  105.06    4.27
  -4   2   1    0.80    0.36
   2  -4   1   -1.03    0.76
  -4   2  -1    2.00    0.68
   2  -4  -1   -0.03    0.83
   2   2  -1   -0.74    0.64
   2   2   1    0.40    0.57
  -4   2   1    0.17    0.65
   2  -4  -1    0.74    0.64
  -4   2  -1    0.87    0.78
  -2   4  -1   -0.13    0.62
  -2  -2  -1    0.72    0.41
   4  -2   1    2.23    1.12
  -2   4   1   -1.22    0.46
  -2   4  -1    0.67    0.66
   4  -2  -1   -1.61    0.83
  -2  -2   1    0.83    0.39
   1  -4  -1   91.25    4.97
  -4   3  -1   90.03    4.02
   1  -4  -1   88.79    4.01
   3  -4   1   97.18    4.86
   1   3   1   90.65    4.27
   3   1  -1   96.61    5.49
  -4   1   1   93.14    3.92
  -1   4   1   95.01    4.03
  -3   4  -1   91.33    3.98
  -3  -1   1   88.59    3.65
   4  -3   1   93.35    4.91
  -1  -3  -1   90.34    4.34
   4  -1  -1   93.46    5.10
   4   0  -1   68.73    4.83
   0   4   1   64.77    3.63
   0  -4  -1   68.93    5.14
  -4   0   1   67.80    3.56
  -4   4  -1   70.04    3.74
   4  -4   1   74.91    4.70
  -5   2  -1   47.38    2.88
   3  -5  -1   51.79    3.28
   2   3  -1   55.48    3.43
   2  -5   1   48.30    5.50
  -2   5  -1   51.15    3.00
  -2  -3   1   44.77    5.26
  -5   2   1   38.14    2.79
   2  -5  -1   55.27    7.28
  -5   3  -1   45.49    2.89
   0   0   2  423.85    6.37
   0   0  -2  432.12    8.05
   0   0   2  430.75    6.71
   0  -1   2  428.29    6.44
   1   0   2  422.04    6.52
   0   1  -2  442.18    7.90
  -1   0  -2  420.60    7.36
   0   1  -2  430.44    5.86
   1  -1  -2  420.52    6.56
  -1   1   2  428.42    6.54
  -1   1   2  426.19    6.36
   0  -1   2  412.24    7.89
   1  -1  -2  427.86    8.00
   1   0   2  428.96    6.54
  -1   0  -2  436.62    6.86
  -1   1  -2  298.12    5.27
   1  -1   2  289.85    4.63
   0   1   2  286.42    4.79
   1   0  -2  287.43    5.84
   1   0  -2  295.50    6.58
  -1   0   2  284.86    5.02
  -1   1  -2  293.86    5.13
   0  -1  -2  288.25    5.84
   0   1   2  286.92    5.27
   1  -1   2  287.92    5.57
   2   0   2  126.03    4.21
   0   2  -2  125.06    2.91
   0   2  -2  122.21    4.30
   0  -2   2  120.99    4.76
  -2   2   2  122.82    3.34
  -2   0  -2  123.03    3.86
   2   0   2  123.44    3.45
   2  -2  -2  120.99    3.75
  -2   2   2  123.89    3.14
   2  -2  -2  123.93    4.37
  -2   1  -2  272.76    5.70
  -2   1   2  257.32    4.60
   1  -2   2  253.66    6.33
   1   1   2  284.60    6.49
   1   1   2  273.45    5.08
   1   1  -2  274.27    6.54
  -2   1   2  271.03    5.31
   1  -2  -2  273.15    6.45
   1  -2  -2  271.12    5.12
   1   1   2  277.26    5.93
   1   1  -2  272.47    7.27
  -1  -1   2  270.29    5.06
  -1   2   2  265.90    4.88
  -1  -1  -2  270.30    5.69
   2  -1  -2  274.29    6.23
  -1   2  -2  275.72    6.05
   2  -1  -2  262.93    7.12
  -1   2   2  276.77    5.48
  -1   2  -2  273.61    5.28
   2  -1   2  269.78    6.18
   2  -1   2  271.99    5.15
  -2   2  -2  196.93    4.88
   2  -2   2  202.43    3.83
   2   0  -2  199.73    5.93
   2   0  -2  202.42    5.42
   0   2   2  199.61    4.91
   0  -2  -2  199.49    4.31
   0   2   2  201.29    3.79
   0  -2  -2  200.65    5.53
  -2   0   2  196.89    4.65
   2  -2   2  200.80    5.67
  -2   2  -2  204.32    4.20
   0   3  -2  135.05    5.30
   0  -3   2  136.05    5.87
  -3   0  -2  139.70    4.61
   3   0   2  138.68    4.43
  -3   3   2  141.05    4.35
   3  -3  -2  134.02    5.22
   3   0   2  135.63    5.45
   3  -3  -2  138.93    4.92
   2  -3  -2  110.33    3.76
   1   2  -2  105.48    4.53
  -3   1  -2  107.03    3.87
   1  -3   2  109.23    4.76
  -3   2   2  111.22    3.40
   2   1   2  115.07    4.65
   2   1   2  106.55    3.54
   2  -3  -2  111.49    4.57
  -3   2   2  109.91    3.48
   3  -2  -2  104.27    4.84
  -1   3  -2  104.02    4.19
  -1  -2   2  111.05    3.18
   3  -2  -2  113.26    4.46
   3  -1   2  116.48    4.71
   3  -1   2  110.20    3.56
  -2  -1  -2  100.97    4.05
  -2   3   2  108.76    3.69
  -2  -1  -2  110.74    3.73
  -1  -2   2  114.21    5.29
  -1   3  -2  108.00    3.45
   1   2   2   67.04    2.38
   1   2   2   70.10    3.48
   2   1  -2   71.06    4.10
  -3   1   2   68.27    2.93
  -3   2  -2   65.93    3.00
   2   1  -2   65.07    3.33
   1  -3  -2   62.37    2.62
   1  -3  -2   70.89    3.65
   2  -3   2   65.49    3.59
   3  -2   2   68.64    3.68
  -2   3  -2   67.43    2.93
   3  -2   2   66.59    2.44
  -1  -2  -2   69.53    3.12
   3  -1  -2   72.38    3.76
  -2  -1   2   69.25    2.73
   3  -1  -2   62.74    2.93
  -1   3   2   68.85    2.97
  -1  -2  -2   67.61    3.45
  -2   3  -2   69.25    2.95
   0   3   2  146.70    4.98
   0  -3  -2  152.80    5.80
   0  -3  -2  148.43    4.47
  -3   3  -2  146.58    4.91
   3   0  -2  147.81    6.21
  -3   0   2  146.78    4.66
   3  -3   2  148.35    5.74
   4  -4  -2   27.85    3.44
   0   4  -2   27.57    2.77
  -4   4   2   28.97    2.33
   0  -4   2   29.68    4.39
   4   0   2   37.98    4.62
   3  -4  -2   26.29    2.85
   3   1   2   25.27    1.92
   1   3  -2   27.64    3.71
   3   1   2   30.68    3.73
  -4   1  -2   22.60    2.09
  -4   3   2   25.50    1.84
   1  -4   2   20.99    3.20
   3  -4  -2   23.56    2.39
  -3   4   2   25.98    2.14
  -3  -1  -2   26.24    2.15
   4  -3  -2   26.62    3.40
  -1   4  -2   33.99    4.16
  -1   4  -2   28.68    1.91
   4  -1   2   31.45    3.94
  -1  -3   2   22.91    3.52
  -4   2  -2  106.73    4.43
   2  -4  -2  107.38    4.10
   2   2   2  107.70    3.73
  -4   2   2  111.51    4.12
   2  -4  -2  105.17    5.10
   2  -4   2  112.56    5.57
   2   2  -2  106.28    4.89
  -2   4  -2  115.26    4.28
   4  -2  -2  109.58    5.51
   4  -2   2  109.34    5.50
  -2  -2   2  109.47    3.72
  -2   4   2  103.05    4.27
  -2   4  -2  108.79    4.58
  -2  -2  -2  107.80    4.68
   3  -4   2   43.73    4.53
   1  -4  -2   38.30    3.29
  -4   3  -2   40.14    2.89
   1   3   2   41.28    3.06
  -4   1   2   40.70    2.69
   3   1  -2   40.32    4.68
   4  -1  -2   47.37    5.32
  -1   4   2   44.07    2.82
  -1  -3  -2   38.52    3.60
  -3   4  -2   45.10    2.80
   4  -3   2   44.40    4.73
  -3  -1   2   42.15    2.57
  -4   4  -2   19.49    2.63
   0   4   2   18.74    2.53
   0  -4  -2   16.38    3.24
  -4   0   2   18.45    2.69
   4  -4   2   20.18    3.39
   4   0  -2   20.80    3.65
   3  -5  -2   15.76    3.07
  -5   2  -2   19.40    2.53
  -2   5  -2   24.41    4.19
  -2   5  -2   19.39    2.19
   0   0   3   65.21    2.40
   0   0  -3   68.77    3.37
  -1   1   3  411.89    7.16
   1  -1  -3  399.74    6.57
   1  -1  -3  399.51    9.22
   0   1  -3  410.50    8.64
  -1   1   3  409.42    6.58
  -1   0  -3  407.77    7.78
   0  -1   3  415.51    7.14
   0  -1   3  410.46    7.91
   1   0   3  417.76    6.96
  -1   0  -3  417.05    8.17
   0   1  -3  408.59    5.96
   0   1   3  229.01    5.09
   1   0  -3  227.08    6.82
   1  -1   3  232.30    4.59
   1   0  -3  224.35    5.33
  -1   0   3  227.24    4.77
  -1   1  -3  225.83    4.75
   0  -1  -3  227.61    5.82
  -1   1  -3  241.83    5.58
   0   1   3  231.90    4.80
   1  -1   3  225.99    5.07
  -2   0  -3  158.96    4.97
   0   2  -3  158.84    5.33
   0  -2   3  166.66    5.64
  -2   2   3  157.17    4.12
   2   0   3  161.69    4.69
   2  -2  -3  162.78    5.85
   2   0   3  162.96    4.28
   0  -2   3  165.47    3.93
   0   2  -3  155.88    3.34
  -2   2   3  160.35    4.06
   2  -2  -3  167.61    4.48
   1  -2   3   25.83    2.55
  -2   1   3   24.44    1.62
  -2   1  -3   23.48    1.72
  -2   1   3   22.06    1.06
   1   1  -3   21.35    2.63
   1   1   3   25.00    1.45
   1   1   3   23.64    1.89
   1  -2  -3   24.84    2.13
   1   1  -3   23.29    2.17
   1  -2   3   26.87    1.27
  -1   2   3   22.10    1.48
  -1   2  -3   22.38    1.84
   2  -1  -3   26.11    3.42
  -1   2   3   22.94    1.52
   2  -1   3   27.30    1.48
  -1   2  -3   24.02    1.64
  -1  -1  -3   24.60    1.86
  -1  -1   3   23.75    1.51
   2  -1  -3   24.96    1.86
   2  -1   3   25.33    1.95
  -2   2  -3  208.79    5.30
   0  -2  -3  216.89    6.23
  -2   0   3  216.60    5.23
   2  -2   3  215.66    6.18
   2   0  -3  217.09    6.59
   0   2   3  211.24    4.53
  -2   2  -3  217.18    4.89
   0   2   3  211.62    5.51
   2  -2   3  216.82    4.37
   2   0  -3  218.41    6.49
   3  -3  -3    4.79    1.06
   0  -3   3    3.58    1.29
   0   3  -3    6.09    1.72
   3  -3  -3    5.52    1.72
  -3   3   3    4.95    0.93
   3   0   3    5.36    1.44
  -3   0  -3    5.23    1.29
   3   0   3    8.73    1.69
   2   1   3  129.73    4.06
   1  -3   3  126.63    5.36
   1   2  -3  124.61    5.22
   2  -3  -3  125.68    5.33
   2  -3  -3  126.60    3.98
  -3   1  -3  133.31    4.70
  -3   2   3  129.91    4.13
  -3   2   3  123.22    3.59
  -1  -2   3  128.48    5.57
  -1  -2   3  134.70    3.79
  -2   3   3  130.06    4.22
  -2  -1  -3  130.34    4.44
   3  -1   3  122.67    4.92
   3  -1   3  129.19    4.05
   3  -2  -3  125.64    4.79
  -2  -1  -3  136.70    5.01
  -1   3  -3  133.03    3.92
  -1   3  -3  130.82    4.96
   3  -2  -3  135.38    6.17
  -3   2  -3  119.33    4.42
   1   2   3  122.12    4.82
   1   2   3  123.30    3.63
   1  -3  -3  121.07    5.20
   2   1  -3  127.01    5.07
   2   1  -3  124.73    5.59
  -3   1   3  127.43    4.26
   2  -3   3  123.99    5.14
   3  -2   3  124.59    3.67
  -2  -1   3  123.05    4.00
  -2   3  -3  125.48    4.28
   3  -1  -3  122.14    5.11
   3  -1  -3  130.53    5.19
  -1   3   3  130.54    4.42
   3  -2   3  123.45    5.08
  -2   3  -3  124.18    4.19
  -1  -2  -3  124.33    4.79
   3   0  -3    5.10    1.74
  -3   3  -3    6.52    1.49
   3   0  -3    4.89    1.25
  -3   0   3    4.07    1.13
   0   3   3    3.19    0.98
   0  -3  -3    7.43    1.95
   3  -3   3    4.95    1.57
  -4   0  -3   37.25    3.03
   4   0   3   38.53    2.61
   4  -4  -3   38.44    2.84
   0  -4   3   32.28    4.13
  -4   4   3   39.76    2.62
   0   4  -3   38.59    4.99
   3  -4  -3   73.51    4.52
   1   3  -3   69.20    4.30
  -4   1  -3   69.03    3.98
   1  -4   3   65.28    4.73
   3   1   3   70.90    3.36
   4  -3  -3   72.73    4.27
   4  -1   3   69.88    4.39
  -1   4  -3   68.20    4.15
  -3   4   3   71.38    3.65
  -1  -3   3   74.09    4.95
   4  -1   3   69.20    3.52
  -3  -1  -3   69.20    3.89
  -4   2  -3    3.27    1.50
   2  -4   3    3.84    1.76
   2  -4  -3    1.96    1.15
  -4   2   3    2.23    1.09
   2   2   3    3.78    0.87
   2   2  -3    2.38    1.24
   4  -2  -3    1.65    1.29
  -2  -2  -3    1.08    0.84
  -2  -2   3    2.87    1.80
  -2   4  -3    2.64    1.05
  -2   4   3    1.60    0.84
  -2  -2   3    1.49    0.81
   4  -2   3    4.23    1.21
  -2   4  -3    4.11    1.18
   4  -2   3    4.88    1.55
   3  -4   3   51.10    3.86
   1   3   3   55.29    3.62
   3   1  -3   42.20    4.79
  -4   3  -3   52.56    3.50
  -4   1   3   55.72    3.26
   1  -4  -3   57.12    4.17
  -1  -3  -3   52.72    4.08
  -1   4   3   55.68    3.32
  -3   4  -3   50.97    3.09
   4  -1  -3   56.90    4.43
   4  -3   3   64.63    4.11
  -3  -1   3   53.63    3.09
   0   4   3   56.49    3.71
  -4   0   3   59.69    3.44
   4  -4   3   59.91    4.04
   0  -4  -3   59.29    4.86
   4   0  -3   57.80    6.22
  -4   4  -3   53.04    3.25
   0   0  -4  523.71    8.65
   0   0  -4  536.77   11.79
   0   0   4  542.66    9.40
   0   1  -4   41.02    1.58
   0  -1   4   42.13    2.15
   1  -1  -4   36.17    3.23
  -1   1   4   38.52    2.18
   0  -1   4   37.04    2.25
   1   0   4   37.75    2.01
  -1   0  -4   37.29    2.81
  -1   1   4   40.38    1.78
  -1   0  -4   38.02    2.21
   0   1  -4   38.48    2.86
   1  -1   4    2.08    0.79
  -1   1  -4    1.24    1.01
   1   0  -4    0.15    1.25
   0   1   4    0.55    0.58
  -1   0   4    1.38    0.80
   0   1   4    0.92    0.43
  -1   1  -4    2.81    0.88
   0  -1  -4    1.75    1.02
   1   0  -4    1.45    0.66
   1  -1   4    1.24    0.84
  -2   0  -4    3.30    0.92
   0   2  -4    3.45    1.23
   2  -2  -4    3.61    1.73
   2   0   4    4.71    1.13
   2  -2  -4    3.15    0.62
   0  -2   4    4.08    1.19
  -2   2   4    2.94    1.06
   0  -2   4    4.98    0.97
  -2   2   4    2.69    0.59
   1   1  -4  272.01    8.17
   1  -2   4  288.63    7.12
   1  -2  -4  272.75    8.04
   1  -2   4  277.43    5.78
  -2   1  -4  267.25    6.88
  -2   1   4  262.46    5.46
   1   1   4  276.29    6.15
  -2   1   4  280.23    6.39
   1   1   4  285.35    7.17
   2  -1   4  279.48    6.04
   2  -1  -4  291.71    9.44
  -1   2  -4  286.77    6.02
  -1   2   4  284.04    6.17
  -1  -1  -4  286.25    7.39
   2  -1   4  277.15    6.48
  -1   2  -4  284.51    7.42
   2  -1  -4  273.25    6.78
  -1  -1   4  282.97    6.26
  -1  -1   4  278.71    7.43
  -1   2   4  273.50    6.30
   0   2   4   38.04    2.37
   2  -2   4   38.74    1.78
   2  -2   4   37.14    2.66
   2   0  -4   37.19    2.71
  -2   0   4   36.08    2.15
   0  -2  -4   36.88    2.76
  -2   2  -4   37.86    2.46
  -2   2  -4   38.90    1.97
   0   2   4   37.23    1.91
   2   0  -4   37.67    3.30
  -3   0  -4  111.89    5.11
  -3   3   4  113.46    4.03
   0  -3   4  111.74    5.25
   3   0   4  111.39    4.21
   0   3  -4  108.11    5.35
   3  -3  -4  108.63    6.06
  -3   2   4   31.98    2.21
   1   2  -4   32.61    2.91
   2   1   4   29.13    1.98
  -3   1  -4   29.26    2.53
   2  -3  -4   32.91    3.01
   1  -3   4   40.28    4.16
  -2   3   4   31.19    2.07
  -2  -1  -4   31.76    2.48
  -1   3  -4   31.23    2.41
  -1   3  -4   31.37    2.08
   3  -2  -4   35.42    3.60
   3  -2  -4   27.55    2.14
  -1  -2   4   33.53    1.92
   3  -1   4   29.29    2.29
  -1  -2   4   29.38    3.38
   3  -1   4   30.92    2.03
   2   1  -4    4.34    1.56
   2  -3   4    4.44    1.48
  -3   2  -4    5.36    1.45
   1   2   4    6.93    1.24
   2   1  -4    4.60    1.67
   1   2   4    4.48    1.19
  -3   1   4    5.02    1.38
   1  -3  -4    4.38    1.52
   3  -1  -4    6.72    1.79
  -2   3  -4    4.67    1.18
  -2  -1   4    6.46    1.31
   3  -2   4    6.54    1.47
  -1   3   4    4.94    1.15
  -2   3  -4    5.24    1.13
  -1  -2  -4    5.45    1.48
   3  -2   4    6.25    1.09
   3  -1  -4    5.04    1.10
   0  -3  -4  111.76    5.51
   3   0  -4  111.10    5.76
  -3   0   4  108.21    4.47
   0   3   4  112.37    4.94
  -3   3  -4  113.54    4.66
   3  -3   4  110.99    5.16
   3   0  -4  103.24    5.05
  -4   4   4   18.16    1.51
   3  -4  -4    4.89    1.80
  -4   1  -4    4.34    1.72
   3   1   4    5.44    1.14
   1   3  -4    2.46    1.42
   1  -4   4    1.58    1.41
  -1   4  -4    5.60    1.63
   4  -3  -4    8.13    1.54
   4  -1   4    7.38    1.65
  -3  -1  -4    5.26    1.80
  -3   4   4    5.20    1.26
  -1  -3   4    5.59    2.19
   2  -4  -4   76.47    4.88
  -4   2   4   73.61    3.74
   2  -4   4   76.89    4.73
   2   2   4   75.02    3.26
  -4   2  -4   77.17    4.49
   2   2  -4   70.97    4.37
  -2  -2   4   74.74    4.61
   4  -2   4   72.58    3.51
   4  -2   4   70.58    4.25
  -2  -2   4   63.22    3.83
  -2   4  -4   73.63    3.34
  -2   4   4   75.19    3.96
   4  -2  -4   77.27    4.75
  -2   4  -4   70.95    3.92
  -2  -2  -4   69.46    4.12
  -4   1   4   24.91    3.29
   3   1  -4   22.93    3.79
   1  -4  -4   20.03    3.58
   1   3   4   19.12    2.66
   3   1  -4   21.29    3.04
   3  -4   4   21.61    3.24
  -4   3  -4   20.37    3.01
  -3  -1   4   22.61    2.89
   4  -1  -4   14.30    2.76
  -1  -3  -4   21.69    3.61
   4  -3   4   22.14    3.30
  -1   4   4   24.43    2.99
  -3   4  -4   25.92    2.21
   0   0  -5   -0.20    0.68
   0   0   5   -0.28    0.57
   0   0  -5   -0.29    1.15
   1   0   5   42.02    2.40
   0   1  -5   40.46    3.38
   0  -1   5   42.95    2.31
  -1   0  -5   39.69    3.13
   0   1  -5   38.14    1.82
   1  -1  -5   39.07    3.82
  -1   0  -5   40.33    2.41
  -1   1   5   43.62    2.08
  -1   1   5   38.25    2.35
   0  -1   5   39.45    2.22
  -1   1  -5  204.38    5.38
  -1   0   5  197.74    5.57
   0   1   5  202.62    5.41
   1   0  -5  201.15    8.16
   0  -1  -5  202.27    7.48
   1  -1   5  198.05    5.31
   0   1   5  200.97    5.43
   1  -1   5  209.74    5.03
   2  -2  -5  122.13    6.63
  -2   0  -5  125.11    4.94
  -2   2   5  121.40    4.38
   0  -2   5  123.92    3.95
   0   2  -5  121.20    5.67
  -2   2   5  130.18    4.02
   0  -2   5  126.62    4.68
   2   0   5  118.47    4.31
   1  -2   5    1.61    0.66
  -2   1  -5    0.94    0.72
  -2   1   5    0.03    0.63
   1  -2  -5    0.73    1.11
   1   1  -5    0.52    1.16
   1   1   5    0.02    0.60
   1  -2   5    1.55    0.99
  -1   2  -5    0.34    0.78
  -1  -1  -5    0.77    1.02
  -1  -1   5   -0.33    0.48
   2  -1  -5   -0.67    1.08
  -1  -1   5    0.92    0.83
   2  -1   5    1.28    0.63
  -1   2   5    1.43    0.83
  -1   2   5    0.55    0.44
   2  -1  -5    0.28    0.53
  -1   2  -5    1.09    0.93
   2   0  -5   29.13    4.20
   2   0  -5   39.75    2.76
   2  -2   5   37.31    2.59
   0   2   5   38.85    2.19
  -2   2  -5   34.75    2.50
   0   2   5   36.87    2.46
   2  -2   5   37.29    1.97
   0  -2  -5   37.00    3.03
  -2   0   5   33.28    2.35
   3   0   5    1.16    0.93
   0  -3   5    0.99    0.94
   0   3  -5    0.92    1.10
  -3   3   5    0.77    0.54
   3  -3  -5    6.22    2.06
  -3   0  -5    0.71    1.35
   2   1   5   30.59    2.10
   2  -3  -5   27.95    3.98
  -3   1  -5   31.11    2.69
   1  -3   5   32.12    3.36
  -3   2   5   27.36    3.09
   1   2  -5   23.77    3.58
   3  -2  -5   21.35    3.65
  -1  -2   5   30.15    3.39
  -2   3   5   34.76    2.30
  -2  -1  -5   34.76    2.84
   3  -1   5   29.66    2.30
  -1   3  -5   31.21    2.81
  -1  -2   5   27.93    1.94
   2  -3   5   82.39    4.28
   1   2   5   75.41    4.05
   2   1  -5   75.91    4.89
  -3   2  -5   79.43    4.11
  -3   1   5   82.78    3.92
   1   2   5   74.89    3.27
   1  -3  -5   72.78    4.87
   3  -1  -5   76.54    4.26
  -2  -1   5   78.22    3.72
   3  -2   5   78.21    3.47
   3  -1  -5   72.70    5.26
   3  -2   5   74.52    3.24
  -1   3   5   81.59    4.01
  -1  -2  -5   76.33    4.47
  -2   3  -5   82.08    3.72
   0  -3  -5    0.54    1.62
  -3   3  -5    1.75    1.26
   0   3   5    1.71    0.92
  -3   0   5    1.01    1.06
   3   0  -5    0.17    1.46
   3   0  -5    2.00    1.39
   3  -3   5    1.99    0.99
   3  -4  -5   25.72    4.07
  -1   4  -5   36.19    3.47
  -3   4   5   37.97    2.55
   2   2  -5   -0.28    1.18
   2  -4  -5    0.64    1.34
   2  -4   5    3.53    1.42
   2   2   5    1.95    0.98
  -4   2  -5    4.55    1.78
  -4   2   5    2.47    1.17
  -2   4   5    1.02    0.77
   4  -2   5    3.76    1.20
   4  -2  -5    2.38    1.19
  -2  -2  -5    2.34    1.28
  -2  -2   5    1.41    1.31
   3  -4   5   23.06    2.79
   3   1  -5   24.60    3.35
  -3   4  -5   27.86    1.96
   4  -3   5   19.73    2.20
  -1  -3  -5   21.25    3.36
   4  -1  -5   21.11    2.78
  -3  -1   5   12.94    2.14
   0   0   6   34.41    2.13
   0   0  -6   35.43    3.22
   0   0  -6   36.29    1.95
  -1   0  -6   84.70    3.50
   0  -1   6   77.35    3.31
   0   1  -6   79.36    4.88
   0  -1   6   81.33    3.25
  -1   0  -6   80.98    4.59
  -1   1   6   83.61    3.63
   1   0   6   78.01    3.57
   1  -1  -6   78.23    5.29
  -1   1  -6   26.47    2.59
   1  -1   6   23.75    1.70
   0   1   6   23.06    1.66
  -1   0   6   17.49    2.20
   1   0  -6   21.10    3.72
  -1   1  -6   22.74    1.96
   0  -1  -6   19.30    3.28
   0   1   6   20.17    2.39
   2   0   6   11.22    1.75
  -2   2   6   12.39    2.01
   0  -2   6   12.83    1.94
   0  -2   6   10.70    1.42
  -2   0  -6   10.56    1.68
   2  -2  -6   12.24    3.06
   0   2  -6    9.51    2.42
   1  -2  -6   31.09    4.82
   1  -2   6   32.95    1.85
   1   1  -6   22.09    3.59
  -2   1  -6   33.92    2.67
   1   1   6   28.06    2.21
   1  -2   6   32.19    2.10
  -2   1   6   28.09    3.16
  -1  -1   6   39.41    2.36
  -1   2  -6   32.54    2.88
  -1   2   6   32.24    2.16
  -1  -1  -6   35.89    2.59
  -1  -1  -6   34.35    3.22
  -1   2   6   32.32    2.11
  -1  -1   6   29.25    2.22
   2  -1  -6   22.91    3.97
   2  -1   6   34.04    2.32
  -2   2  -6   46.01    3.07
   0   2   6   48.30    3.11
   0   2   6   47.40    2.66
   2  -2   6   49.15    2.68
  -2   0   6   52.25    3.22
   0  -2  -6   53.26    4.49
   2   0  -6   47.80    4.34
   3   0   6   20.17    2.50
   3  -3  -6   13.56    3.01
   0  -3   6   15.83    2.58
  -3   0  -6   21.51    3.01
   0   3  -6   17.05    3.33
   1   2  -6   30.55    4.63
   1  -3   6   32.40    2.57
   2  -3  -6   33.94    5.18
  -3   2   6   29.07    3.30
  -3   1  -6   32.50    3.01
   2   1   6   30.76    2.23
  -2  -1  -6   26.58    3.12
  -2   3   6   36.08    2.64
  -1  -2   6   26.22    2.93
   3  -2  -6   24.31    4.19
   3  -1   6   28.03    3.28
  -1  -2   6   30.44    2.04
  -1   3  -6   28.15    4.01
  -3   2  -6    4.28    1.57
   1   2   6    4.06    1.17
   2  -3   6    5.13    1.49
   1  -3  -6    6.79    2.25
   2   1  -6    2.31    1.70
  -3   1   6    8.10    1.92
   3  -2   6    5.30    1.31
  -2  -1   6   12.00    1.88
  -2  -1   6    1.11    1.12
  -1  -2  -6    6.01    2.08
   3  -1  -6    7.97    2.24
  -1   3   6    4.42    1.50
  -3   0   6   18.76    2.53
   3   0  -6   17.15    3.18
   3   0  -6   19.75    3.02
  -3   3  -6   17.39    2.65
   0   3   6   19.92    2.62
   0  -3  -6   24.60    3.76
   0   0   7   15.24    2.19
   0   0  -7   12.88    2.86
   0  -1   7   31.25    2.22
   1  -1  -7   25.88    4.20
  -1   1   7   33.43    2.29
  -1   0  -7   32.14    3.07
   0   1  -7   21.18    3.61
   1   0   7   27.31    3.08
  -1   0  -7   32.02    2.27
   0   1   7   19.52    2.40
   0  -1  -7   15.69    3.63
  -1   1  -7   22.82    1.62
  -1   0   7   21.42    2.90
   1  -1   7   19.15    2.54
  -1   1  -7   18.86    3.33
   0  -1  -7   22.78    1.93
   1   0  -7   16.85    3.65
  -2   0  -7   19.87    2.49
  -2   2   7   14.64    2.12
   0  -2   7   13.23    1.78
   0   2  -7   10.17    2.48
   2   0   7   13.89    2.31
   2  -2  -7   15.05    3.40
  -2   1  -7    9.02    1.63
   1  -2  -7    8.10    3.20
   1  -2   7    6.73    1.55
   1   1  -7    4.68    2.28
   1   1   7    9.30    1.86
  -2   1   7    7.27    1.89
  -1   2  -7    7.22    2.09
   2  -1  -7    9.61    3.19
  -1  -1  -7    4.68    2.34
  -1  -1   7    9.45    1.92
   2  -1   7    6.41    1.61
  -1  -1  -7   13.40    1.94
  -1   2   7    8.70    1.62
  -1   2   7    8.83    1.68
   0  -2  -7   13.53    3.29
  -2   2  -7   16.11    2.13
   2  -2   7   12.62    2.13
   2   0  -7   16.04    3.64
  -2   0   7   18.35    2.86
   0   2   7   15.24    1.94
   0   2   7   16.72    2.46
  -3   2   7   10.65    1.62
   1  -3   7   11.72    1.94
  -1   3  -7   11.62    2.01
   3  -2  -7    9.64    2.35
  -1  -2   7    8.01    1.27
  -3   2  -7   14.56    1.98
   1   2   7   13.52    1.92
   3  -1  -7   14.18    3.13
  -1  -2  -7   11.39    2.89
  -2  -1   7   10.69    1.97
  -1   3   7   15.24    2.29
   3  -2   7   13.46    1.72
   0   0  -8   28.02    4.45
   0   0   8   30.68    2.31
   0   1  -8    4.44    2.61
   1  -1  -8    7.78    2.61
   1   0   8    1.53    1.14
  -1   0  -8    0.46    1.51
  -1   1   8    2.21    1.19
   0  -1   8    3.14    1.19
  -1   0  -8    3.79    1.13
   0  -1  -8    1.06    1.96
   1   0  -8    1.99    1.89
   0  -1  -8    3.90    1.11
  -1   0   8    2.91    1.13
  -1   1  -8    0.05    1.59
   0   1   8   -0.38    0.87
   1  -1   8    3.38    1.17
   0  -2   8   -1.13    0.80
  -2   1  -8   17.14    2.09
   1  -2   8   14.87    1.90
  -1  -1  -8   23.14    1.93
  -1   2  -8   13.22    2.37
  -1   2   8   24.84    1.70
   2  -1   8   19.33    3.78
  -1  -1   8   15.80    2.05
  -1  -1  -8   11.07    3.62
   0   2   8    3.79    0.98
   2  -2   8    4.11    1.34
   0   0   0    0.00    0.00
;
_shelx_hkl_checksum    7421
